# Supplementary material for: eXplainable Artificial Intelligence (XAI) for the identification of biologically relevant gene expression patterns in longitudinal human studies, insights from obesity research
Source: PubMed Central journal article supplement (PMC7176286; doi:10.1371/journal.pcbi.1007792), 2020-04-10
Supplement: pcbi.1007792.s010.pdf [file pcbi.1007792.s010.pdf]

**Supplementary table 1.** 50 output sequential rules identified from the discovery GSE77962 dataset (LCD group).

| LHS                 | RHS                        | BP   | CC   | CF   | CONF | CONV | LIFT | MF   | SP   | SUP   | TF   |
|---------------------|----------------------------|------|------|------|------|------|------|------|------|-------|------|
| {7916432/DHCR24=1}  | {7932227/NMT2=1}           | 1.61 | 1.61 | 0.59 | 0.83 | 2.45 | 1.41 | 1.61 | 6.00 | 10.00 | 0.00 |
| {7916432/DHCR24=1}  | {8166079/EGFL6=1}          | 1.84 | 1.84 | 0.63 | 0.92 | 2.73 | 1.19 | 1.84 | 6.00 | 11.00 | 0.00 |
| {7923578/FMOD=1}    | {8029530/APOE=2}           | 1.38 | 1.38 | 0.45 | 0.75 | 1.82 | 1.38 | 6.00 | 6.00 | 9.00  | 0.00 |
| {7928872/SNCG=1}    | {7932227/NMT2=1}           | 1.78 | 1.78 | 0.39 | 0.75 | 1.64 | 1.27 | 1.78 | 1.20 | 9.00  | 0.00 |
| {7928872/SNCG=1}    | {8166079/EGFL6=1}          | 1.87 | 1.87 | 0.27 | 0.83 | 1.36 | 1.08 | 1.87 | 1.20 | 10.00 | 0.00 |
| {7928872/SNCG=1}    | {7928872/SNCG=2}           | 1.00 | 1.00 | 0.67 | 0.83 | 3.00 | 1.67 | 1.00 | 1.20 | 10.00 | 0.00 |
| {7974341/GNG2=1}    | {7930921/BAG3=1}           | 1.74 | 1.74 | 0.32 | 0.69 | 1.48 | 1.27 | 1.74 | 6.00 | 9.00  | 0.00 |
| {8166079/EGFL6=1}   | {7930921/BAG3=1}           | 1.84 | 1.84 | 0.09 | 0.59 | 1.10 | 1.08 | 1.84 | 1.20 | 10.00 | 0.00 |
| {7948612/FADS1=1}   | {7932227/NMT2=1}           | 1.64 | 1.64 | 0.56 | 0.82 | 2.25 | 1.38 | 1.64 | 6.00 | 9.00  | 0.00 |
| {7974341/GNG2=1}    | {7932227/NMT2=1}           | 1.77 | 1.77 | 0.62 | 0.85 | 2.66 | 1.43 | 1.77 | 6.00 | 11.00 | 0.00 |
| {7989670/RBPMS2=1}  | {7932227/NMT2=1}           | 1.69 | 1.69 | 0.39 | 0.75 | 1.64 | 1.27 | 1.69 | 1.20 | 9.00  | 0.00 |
| {8002303/NQO1=1}    | {7932227/NMT2=1}           | 1.71 | 1.71 | 0.19 | 0.67 | 1.23 | 1.13 | 1.71 | 1.20 | 12.00 | 0.00 |
| {8034940/NOTCH3=1}  | {7932227/NMT2=1}           | 1.59 | 1.59 | 0.13 | 0.64 | 1.15 | 1.09 | 1.59 | 6.00 | 9.00  | 1.00 |
| {8061227/SLC24A3=1} | {7932227/NMT2=1}           | 1.87 | 1.87 | 0.13 | 0.64 | 1.15 | 1.09 | 1.87 | 1.20 | 9.00  | 0.00 |
| {8061227/SLC24A3=1} | {7945232/ADAMTS15=1}       | 1.92 | 1.92 | 0.29 | 0.64 | 1.40 | 1.29 | 1.92 | 1.20 | 9.00  | 0.00 |
| {8172043/SRPX=2}    | {7945232/ADAMTS15=1}       | 1.94 | 1.94 | 0.50 | 0.75 | 2.00 | 1.50 | 6.00 | 1.20 | 9.00  | 0.00 |
| {7974341/GNG2=1}    | {8005475/TRIM16 TRIM16L=1} | 1.67 | 1.67 | 0.66 | 0.92 | 2.95 | 1.19 | 1.67 | 6.00 | 12.00 | 0.00 |
| {7974341/GNG2=1}    | {8124211/GPLD1=1}          | 1.48 | 1.48 | 0.38 | 0.69 | 1.63 | 1.38 | 1.48 | 6.00 | 9.00  | 0.00 |
| {7974341/GNG2=1}    | {8137526/INSIG1=1}         | 1.74 | 1.74 | 0.38 | 0.69 | 1.63 | 1.38 | 1.74 | 6.00 | 9.00  | 0.00 |
| {7974341/GNG2=1}    | {8029530/APOE=2}           | 1.44 | 1.44 | 0.32 | 0.69 | 1.48 | 1.27 | 1.44 | 6.00 | 9.00  | 0.00 |
| {7980970/ITPK1=1}   | {8032829/PLIN4=2}          | 6.00 | 1.90 | 0.50 | 0.75 | 2.00 | 1.50 | 6.00 | 6.00 | 9.00  | 0.00 |

|                                    |                            |      |      |      |      |      |      |      |      |       |      |
|------------------------------------|----------------------------|------|------|------|------|------|------|------|------|-------|------|
| {7995729/CES1P1=1}                 | {8166079/EGFL6=1}          | 6.00 | 6.00 | 0.21 | 0.61 | 0.58 | 0.79 | 6.00 | 1.20 | 11.00 | 0.00 |
| {8002303/NQO1=1}                   | {8166079/EGFL6=1}          | 1.88 | 1.88 | 0.27 | 0.83 | 1.36 | 1.08 | 1.88 | 1.20 | 15.00 | 0.00 |
| {8061227/SLC24A3=1}                | {8005475/TRIM16 TRIM16L=1} | 1.84 | 1.84 | 0.37 | 0.86 | 1.59 | 1.11 | 1.84 | 1.20 | 12.00 | 0.00 |
| {8022747/B4GALT6=1}                | {8029530/APOE=2}           | 1.50 | 1.50 | 0.60 | 0.82 | 2.50 | 1.50 | 1.50 | 6.00 | 9.00  | 0.00 |
| {8032829/PLIN4=1}                  | {8111864/C6=1}             | 6.00 | 1.92 | 0.48 | 0.69 | 1.92 | 1.69 | 6.00 | 6.00 | 9.00  | 0.00 |
| {8032829/PLIN4=1}                  | {7928872/SNCG=2}           | 6.00 | 1.89 | 0.38 | 0.69 | 1.63 | 1.38 | 6.00 | 1.20 | 9.00  | 0.00 |
| {8032829/PLIN4=1}                  | {8001457/CES1=2}           | 6.00 | 1.89 | 0.44 | 0.69 | 1.77 | 1.52 | 6.00 | 6.00 | 9.00  | 0.00 |
| {8032829/PLIN4=1}                  | {8032829/PLIN4=2}          | 6.00 | 1.83 | 0.54 | 0.77 | 2.17 | 1.54 | 6.00 | 1.20 | 10.00 | 0.00 |
| {8034940/NOTCH3=1}                 | {8166079/EGFL6=1}          | 1.79 | 1.79 | 0.37 | 0.86 | 1.59 | 1.11 | 1.79 | 6.00 | 12.00 | 1.00 |
| {8034940/NOTCH3=1}                 | {8004057/KIF1C=2}          | 1.76 | 1.76 | 0.35 | 0.64 | 1.53 | 1.41 | 1.76 | 6.00 | 9.00  | 1.00 |
| {8034940/NOTCH3=1}                 | {8032829/PLIN4=2}          | 6.00 | 1.84 | 0.29 | 0.64 | 1.40 | 1.29 | 6.00 | 6.00 | 9.00  | 1.00 |
| {8061227/SLC24A3=1}                | {8137526/INSIG1=1}         | 1.86 | 1.86 | 0.43 | 0.71 | 1.75 | 1.43 | 1.86 | 1.20 | 10.00 | 0.00 |
| {8061227/SLC24A3=1}                | {7988283/EIF3J-AS1=2}      | 6.00 | 6.00 | 0.21 | 0.64 | 1.27 | 1.18 | 6.00 | 1.20 | 9.00  | 0.00 |
| {8061227/SLC24A3=1}                | {8032829/PLIN4=2}          | 6.00 | 1.94 | 0.29 | 0.64 | 1.40 | 1.29 | 6.00 | 1.20 | 9.00  | 0.00 |
| {8082965/MRAS=1}                   | {8166079/EGFL6=1}          | 1.82 | 1.82 | 0.60 | 0.91 | 2.50 | 1.18 | 1.82 | 6.00 | 10.00 | 0.00 |
| {8087224/SLC25A20=1}               | {8166079/EGFL6=1}          | 1.96 | 1.96 | 0.27 | 0.83 | 1.36 | 1.08 | 1.96 | 1.20 | 10.00 | 0.00 |
| {7974341/GNG2=1,7916432/DHCR24=1}  | {7932227/NMT2=1}           | 1.81 | 1.81 | 0.76 | 0.90 | 4.09 | 1.52 | 1.81 | 6.00 | 9.00  | 0.00 |
| {7916432/DHCR24=1,8002303/NQO1=1}  | {7932227/NMT2=1}           | 1.74 | 1.74 | 0.56 | 0.82 | 2.25 | 1.38 | 1.74 | 6.00 | 9.00  | 0.00 |
| {7916432/DHCR24=1,8002303/NQO1=1}  | {8166079/EGFL6=1}          | 1.92 | 1.92 | 1.00 | 1.00 | Inf  | 1.29 | 1.92 | 6.00 | 11.00 | 0.00 |
| {8022747/B4GALT6=1,7923578/FMOD=1} | {8029530/APOE=2}           | 1.71 | 1.71 | 0.60 | 0.82 | 2.50 | 1.50 | 6.00 | 6.00 | 9.00  | 0.00 |
| {7928872/SNCG=1,8034940/NOTCH3=1}  | {7932227/NMT2=1}           | 1.83 | 1.83 | 0.76 | 0.90 | 4.09 | 1.52 | 1.83 | 6.00 | 9.00  | 1.00 |
| {7989670/RBPMS2=1,7974341/GNG2=1}  | {7932227/NMT2=1}           | 1.85 | 1.85 | 0.76 | 0.90 | 4.09 | 1.52 | 1.85 | 6.00 | 9.00  | 0.00 |

|                                                     |                    |      |      |      |      |      |      |      |      |       |      |
|-----------------------------------------------------|--------------------|------|------|------|------|------|------|------|------|-------|------|
| {7974341/GNG2=1,8002303/NQO1=1}                     | {7932227/NMT2=1}   | 1.84 | 1.84 | 0.78 | 0.91 | 4.50 | 1.54 | 1.84 | 6.00 | 10.00 | 0.00 |
| {8061227/SLC24A3=1,7974341/GNG2=1}                  | {7932227/NMT2=1}   | 1.90 | 1.90 | 0.56 | 0.82 | 2.25 | 1.38 | 1.90 | 6.00 | 9.00  | 0.00 |
| {7989670/RBPMS2=1,8061227/SLC24A3=1}                | {7932227/NMT2=1}   | 1.93 | 1.93 | 0.56 | 0.82 | 2.25 | 1.38 | 1.93 | 1.20 | 9.00  | 0.00 |
| {8061227/SLC24A3=1,7974341/GNG2=1}                  | {8137526/INSIG1=1} | 1.91 | 1.91 | 0.64 | 0.82 | 2.75 | 1.64 | 1.91 | 6.00 | 9.00  | 0.00 |
| {7980970/ITPK1=1,8034940/NOTCH3=1}                  | {8032829/PLIN4=2}  | 6.00 | 1.90 | 0.50 | 0.75 | 2.00 | 1.50 | 6.00 | 6.00 | 9.00  | 1.00 |
| {8087224/SLC25A20=1,8034940/NOTCH3=1}               | {8166079/EGFL6=1}  | 1.96 | 1.96 | 1.00 | 1.00 | Inf  | 1.29 | 1.96 | 6.00 | 9.00  | 1.00 |
| {7989670/RBPMS2=1,8061227/SLC24A3=1,7974341/GNG2=1} | {7932227/NMT2=1}   | 1.93 | 1.93 | 0.76 | 0.90 | 4.09 | 1.52 | 1.93 | 6.00 | 9.00  | 0.00 |
