# Supplementary material for: eXplainable Artificial Intelligence (XAI) for the identification of biologically relevant gene expression patterns in longitudinal human studies, insights from obesity research
Source: PubMed Central journal article supplement (PMC7176286; doi:10.1371/journal.pcbi.1007792), 2020-04-10
Supplement: pcbi.1007792.s011.pdf [file pcbi.1007792.s011.pdf]

**Supplementary table 2.** 50 output sequential rules identified from the discovery GSE77962 dataset (VLCD group).

| LHS                            | RHS                        | BP   | CC   | CF   | CONF | CONV | LIFT | MF   | SP   | SUP   | TF   |
|--------------------------------|----------------------------|------|------|------|------|------|------|------|------|-------|------|
| {7897068/SKI=1}                | {8146000/ADAM9=1}          | 1.39 | 1.39 | 0.82 | 0.92 | 5.42 | 1.58 | 1.39 | 1.20 | 12.00 | 1.00 |
| {7897068/SKI=1}                | {7981142/CLMN=2}           | 1.79 | 1.79 | 0.63 | 0.85 | 2.71 | 1.45 | 1.79 | 1.20 | 11.00 | 1.00 |
| {7899173/DHDDS=1}              | {7948344/GLYAT=2}          | 1.83 | 1.83 | 0.47 | 0.73 | 1.88 | 1.47 | 1.83 | 6.00 | 11.00 | 0.00 |
| {7899173/DHDDS=1}              | {8094679/KLB=2}            | 1.76 | 1.76 | 0.42 | 0.73 | 1.72 | 1.35 | 1.76 | 6.00 | 11.00 | 0.00 |
| {8042942/HK2=1}                | {7907160/ATP1B1=1}         | 1.42 | 1.42 | 0.60 | 0.79 | 2.53 | 1.71 | 1.42 | 6.00 | 11.00 | 0.00 |
| {7912056/PLEKHG5   TNFRSF25=1} | {8180268/CYP51A1=1}        | 1.87 | 1.87 | 0.82 | 0.92 | 5.50 | 1.69 | 1.87 | 6.00 | 11.00 | 0.00 |
| {7912692/HSPB7=1}              | {8141094/PDK4=1}           | 1.83 | 1.83 | 0.63 | 0.85 | 2.71 | 1.45 | 1.83 | 1.20 | 11.00 | 0.00 |
| {7912692/HSPB7=1}              | {8146000/ADAM9=1}          | 1.89 | 1.89 | 0.63 | 0.85 | 2.71 | 1.45 | 1.89 | 1.20 | 11.00 | 0.00 |
| {7912692/HSPB7=1}              | {7981142/CLMN=2}           | 1.91 | 1.91 | 0.63 | 0.85 | 2.71 | 1.45 | 1.91 | 1.20 | 11.00 | 0.00 |
| {8053484/ST3GAL5=2}            | {7914342/FABP3=1}          | 1.84 | 1.84 | 0.71 | 0.86 | 3.50 | 1.71 | 1.84 | 6.00 | 12.00 | 0.00 |
| {8053484/ST3GAL5=2}            | {7917304/MCOLN3=1}         | 1.84 | 1.84 | 0.53 | 0.79 | 2.14 | 1.45 | 1.84 | 6.00 | 11.00 | 0.00 |
| {7980970/ITPK1=1}              | {7927285/FAM35DP   RHEB=1} | 1.70 | 1.70 | 0.23 | 0.65 | 1.30 | 1.19 | 1.70 | 6.00 | 11.00 | 0.00 |
| {8180257/CEP170=2}             | {7927710/CDK1=1}           | 6.00 | 1.78 | 0.60 | 0.79 | 2.53 | 1.71 | 1.78 | 6.00 | 11.00 | 0.00 |
| {7928872/SNCG=1}               | {8101992/SLC39A8=1}        | 1.90 | 1.90 | 0.47 | 0.80 | 1.88 | 1.28 | 1.90 | 1.20 | 12.00 | 0.00 |
| {7928872/SNCG=1}               | {8146000/ADAM9=1}          | 1.71 | 1.71 | 0.36 | 0.73 | 1.56 | 1.26 | 1.71 | 1.20 | 11.00 | 0.00 |
| {7936322/GPAM=1}               | {8160297/PLIN2=1}          | 1.79 | 1.79 | 0.69 | 0.85 | 3.25 | 1.69 | 6.00 | 6.00 | 11.00 | 0.00 |
| {7936322/GPAM=1}               | {8019392/FASN=2}           | 1.49 | 1.49 | 0.69 | 0.85 | 3.25 | 1.69 | 1.49 | 6.00 | 11.00 | 0.00 |

|                                                |                     |      |      |      |      |      |      |      |      |       |      |
|------------------------------------------------|---------------------|------|------|------|------|------|------|------|------|-------|------|
| {7948344/GLYAT=1}                              | {7948344/GLYAT=2}   | 1.58 | 1.58 | 0.83 | 0.92 | 6.00 | 1.83 | 1.58 | 1.20 | 11.00 | 0.00 |
| {7959298/TMEM120B=1}                           | {8146000/ADAM9=1}   | 1.88 | 1.88 | 0.82 | 0.92 | 5.42 | 1.58 | 1.88 | 1.20 | 12.00 | 0.00 |
| {7959298/TMEM120B=1}                           | {8160297/PLIN2=1}   | 1.92 | 1.92 | 0.69 | 0.85 | 3.25 | 1.69 | 6.00 | 1.20 | 11.00 | 0.00 |
| {7959298/TMEM120B=1}                           | {7981142/CLMN=2}    | 1.88 | 1.88 | 0.63 | 0.85 | 2.71 | 1.45 | 1.88 | 1.20 | 11.00 | 0.00 |
| {7963427/KRT5=1}                               | {8138466/MACC1=1}   | 1.89 | 1.89 | 0.66 | 0.85 | 2.98 | 1.56 | 1.89 | 1.20 | 11.00 | 0.00 |
| {7963427/KRT5=1}                               | {8141094/PDK4=1}    | 1.86 | 1.86 | 0.63 | 0.85 | 2.71 | 1.45 | 1.86 | 1.20 | 11.00 | 0.00 |
| {7963880/ITGA7=1}                              | {8146000/ADAM9=1}   | 1.68 | 1.68 | 0.63 | 0.85 | 2.71 | 1.45 | 1.68 | 6.00 | 11.00 | 0.00 |
| {7980970/ITPK1=1}                              | {8101992/SLC39A8=1} | 1.92 | 1.92 | 0.22 | 0.71 | 1.28 | 1.13 | 1.92 | 6.00 | 12.00 | 0.00 |
| {7980970/ITPK1=1}                              | {8141094/PDK4=1}    | 1.69 | 1.69 | 0.15 | 0.65 | 1.18 | 1.11 | 1.69 | 6.00 | 11.00 | 0.00 |
| {7980970/ITPK1=1}                              | {7935776/=2}        | 6.00 | 6.00 | 0.29 | 0.65 | 1.42 | 1.29 | 6.00 | 6.00 | 11.00 | 0.00 |
| {7980970/ITPK1=1}                              | {8094679/KLB=2}     | 1.80 | 1.80 | 0.23 | 0.65 | 1.30 | 1.19 | 1.80 | 6.00 | 11.00 | 0.00 |
| {7980970/ITPK1=1}                              | {8171172/MXRA5=2}   | 1.98 | 1.98 | 0.15 | 0.65 | 1.18 | 1.11 | 1.98 | 6.00 | 11.00 | 0.00 |
| {7991138/NMB=1}                                | {8146000/ADAM9=1}   | 1.75 | 1.75 | 0.49 | 0.79 | 1.94 | 1.35 | 1.75 | 1.20 | 11.00 | 0.00 |
| {7991846/DECR2 NME4=1}                         | {8101992/SLC39A8=1} | 1.91 | 1.91 | 0.59 | 0.85 | 2.44 | 1.35 | 1.91 | 6.00 | 11.00 | 0.00 |
| {7999591/ABCC6 ABCC6P1 ABCC6P2 LOC105369239=1} | {7981142/CLMN=2}    | 1.91 | 1.91 | 0.25 | 0.69 | 1.33 | 1.18 | 1.91 | 1.20 | 11.00 | 0.00 |
| {8011188/TLCD2=1}                              | {8141094/PDK4=1}    | 6.00 | 1.99 | 0.63 | 0.85 | 2.71 | 1.45 | 6.00 | 1.20 | 11.00 | 0.00 |
| {8011188/TLCD2=1}                              | {8180268/CYP51A1=1} | 6.00 | 1.97 | 0.66 | 0.85 | 2.98 | 1.56 | 6.00 | 6.00 | 11.00 | 0.00 |
| {8011188/TLCD2=1}                              | {7961673/GYS2=2}    | 6.00 | 1.99 | 0.66 | 0.85 | 2.98 | 1.56 | 6.00 | 6.00 | 11.00 | 0.00 |
| {8016033/FAM171A2=1}                           | {8101992/SLC39A8=1} | 6.00 | 1.97 | 0.29 | 0.73 | 1.41 | 1.17 | 6.00 | 1.20 | 11.00 | 0.00 |

|                     |                      |      |      |      |      |      |      |      |      |       |      |
|---------------------|----------------------|------|------|------|------|------|------|------|------|-------|------|
| {8016832/MMD=1}     | {7948344/GLYAT=2}    | 1.84 | 1.84 | 0.47 | 0.73 | 1.88 | 1.47 | 1.84 | 1.20 | 11.00 | 0.00 |
| {8023995/FSTL3=1}   | {8146000/ADAM9=1}    | 1.49 | 1.49 | 0.36 | 0.73 | 1.56 | 1.26 | 1.49 | 1.20 | 11.00 | 0.00 |
| {8023995/FSTL3=1}   | {7948344/GLYAT=2}    | 1.78 | 1.78 | 0.47 | 0.73 | 1.88 | 1.47 | 1.78 | 1.20 | 11.00 | 0.00 |
| {8024323/REEP6=1}   | {8101992/SLC39A8=1}  | 1.90 | 1.90 | 0.47 | 0.80 | 1.88 | 1.28 | 1.90 | 1.20 | 12.00 | 0.00 |
| {8024323/REEP6=1}   | {8141094/PDK4=1}     | 1.86 | 1.86 | 0.36 | 0.73 | 1.56 | 1.26 | 1.86 | 1.20 | 11.00 | 0.00 |
| {8024323/REEP6=1}   | {8094679/KLB=2}      | 1.91 | 1.91 | 0.42 | 0.73 | 1.72 | 1.35 | 1.91 | 1.20 | 11.00 | 0.00 |
| {8033818/OLFM2=1}   | {8033825/COL5A3=2}   | 1.84 | 1.84 | 0.42 | 0.73 | 1.72 | 1.35 | 1.84 | 6.00 | 11.00 | 0.00 |
| {8034544/PRDX2=1}   | {8101992/SLC39A8=1}  | 1.93 | 1.93 | 0.33 | 0.75 | 1.50 | 1.20 | 1.93 | 1.20 | 12.00 | 0.00 |
| {8034544/PRDX2=1}   | {8146000/ADAM9=1}    | 1.78 | 1.78 | 0.25 | 0.69 | 1.33 | 1.18 | 1.78 | 1.20 | 11.00 | 0.00 |
| {8034544/PRDX2=1}   | {8121405/C6orf183=2} | 6.00 | 6.00 | 0.25 | 0.69 | 1.33 | 1.18 | 6.00 | 1.20 | 11.00 | 0.00 |
| {8034783/ADGRL1=1}  | {8141094/PDK4=1}     | 1.87 | 1.87 | 0.15 | 0.65 | 1.18 | 1.11 | 1.87 | 1.20 | 11.00 | 0.00 |
| {8034783/ADGRL1=1}  | {7961673/GYS2=2}     | 1.93 | 1.93 | 0.23 | 0.65 | 1.30 | 1.19 | 1.93 | 6.00 | 11.00 | 0.00 |
| {8034783/ADGRL1=1}  | {8033825/COL5A3=2}   | 1.89 | 1.89 | 0.23 | 0.65 | 1.30 | 1.19 | 1.89 | 6.00 | 11.00 | 0.00 |
| {8034940/NOTCH3=1}  | {7981142/CLMN=2}     | 1.79 | 1.79 | 0.63 | 0.85 | 2.71 | 1.45 | 1.79 | 6.00 | 11.00 | 1.00 |
| {8038261/GYS1=1}    | {8101992/SLC39A8=1}  | 1.96 | 1.96 | 0.43 | 0.79 | 1.75 | 1.26 | 1.96 | 6.00 | 11.00 | 0.00 |
| {8042942/HK2=1}     | {8146000/ADAM9=1}    | 1.59 | 1.59 | 0.49 | 0.79 | 1.94 | 1.35 | 1.59 | 6.00 | 11.00 | 0.00 |
| {8042942/HK2=1}     | {8094679/KLB=2}      | 1.74 | 1.74 | 0.53 | 0.79 | 2.14 | 1.45 | 1.74 | 6.00 | 11.00 | 0.00 |
| {8060325/DEFB132=1} | {8048432/CYP27A1=1}  | 1.98 | 1.98 | 0.57 | 0.79 | 2.33 | 1.57 | 6.00 | 6.00 | 11.00 | 0.00 |
| {8053484/ST3GAL5=2} | {8048432/CYP27A1=1}  | 1.83 | 1.83 | 0.57 | 0.79 | 2.33 | 1.57 | 1.83 | 6.00 | 11.00 | 0.00 |

|                                |                     |      |      |      |      |      |      |      |      |       |      |
|--------------------------------|---------------------|------|------|------|------|------|------|------|------|-------|------|
| {8053406/RETSAT=1}             | {8146000/ADAM9=1}   | 1.90 | 1.90 | 0.49 | 0.79 | 1.94 | 1.35 | 1.90 | 6.00 | 11.00 | 0.00 |
| {8053406/RETSAT=1}             | {8094679/KLB=2}     | 1.89 | 1.89 | 0.53 | 0.79 | 2.14 | 1.45 | 1.89 | 6.00 | 11.00 | 0.00 |
| {8060325/DEFB132=1}            | {7948344/GLYAT=2}   | 1.95 | 1.95 | 0.57 | 0.79 | 2.33 | 1.57 | 6.00 | 1.20 | 11.00 | 0.00 |
| {8060325/DEFB132=1}            | {8094679/KLB=2}     | 1.97 | 1.97 | 0.53 | 0.79 | 2.14 | 1.45 | 6.00 | 1.20 | 11.00 | 0.00 |
| {8067233/PMEPA1=1}             | {8146000/ADAM9=1}   | 1.50 | 1.50 | 0.63 | 0.85 | 2.71 | 1.45 | 1.50 | 1.20 | 11.00 | 0.00 |
| {8067233/PMEPA1=1}             | {8160297/PLIN2=1}   | 1.83 | 1.83 | 0.69 | 0.85 | 3.25 | 1.69 | 6.00 | 1.20 | 11.00 | 0.00 |
| {8067233/PMEPA1=1}             | {7981142/CLMN=2}    | 1.86 | 1.86 | 0.63 | 0.85 | 2.71 | 1.45 | 1.86 | 1.20 | 11.00 | 0.00 |
| {8071806/DDT DDTL LOC391322=1} | {8101992/SLC39A8=1} | 1.94 | 1.94 | 0.78 | 0.92 | 4.50 | 1.47 | 1.94 | 1.20 | 11.00 | 0.00 |
| {8074388/SLC25A1=1}            | {8101992/SLC39A8=1} | 1.84 | 1.84 | 0.43 | 0.79 | 1.75 | 1.26 | 1.84 | 1.20 | 11.00 | 0.00 |
| {8074388/SLC25A1=1}            | {8146000/ADAM9=1}   | 1.83 | 1.83 | 0.49 | 0.79 | 1.94 | 1.35 | 1.83 | 1.20 | 11.00 | 0.00 |
| {8079746/TCTA=1}               | {8146000/ADAM9=1}   | 1.83 | 1.83 | 0.25 | 0.69 | 1.33 | 1.18 | 1.83 | 1.20 | 11.00 | 0.00 |
| {8090852/AMOTL2 RPL39P5=1}     | {8141094/PDK4=1}    | 1.75 | 1.75 | 0.36 | 0.73 | 1.56 | 1.26 | 1.75 | 1.20 | 11.00 | 0.00 |
| {8090852/AMOTL2 RPL39P5=1}     | {8180268/CYP51A1=1} | 1.82 | 1.82 | 0.42 | 0.73 | 1.72 | 1.35 | 1.82 | 6.00 | 11.00 | 0.00 |
| {8109305/SYNPO=1}              | {8101992/SLC39A8=1} | 1.90 | 1.90 | 0.29 | 0.73 | 1.41 | 1.17 | 1.90 | 1.20 | 11.00 | 0.00 |
| {8116649/TUBB2A=1}             | {8101992/SLC39A8=1} | 1.94 | 1.94 | 0.43 | 0.79 | 1.75 | 1.26 | 1.94 | 6.00 | 11.00 | 0.00 |
| {8116653/TUBB2A=1}             | {8101992/SLC39A8=1} | 1.94 | 1.94 | 0.43 | 0.79 | 1.75 | 1.26 | 1.94 | 6.00 | 11.00 | 0.00 |
| {8131326/SLC29A4=1}            | {8101992/SLC39A8=1} | 1.88 | 1.88 | 0.43 | 0.79 | 1.75 | 1.26 | 1.88 | 1.20 | 11.00 | 0.00 |
| {8153684/DGAT1=1}              | {8101992/SLC39A8=1} | 1.85 | 1.85 | 0.33 | 0.75 | 1.50 | 1.20 | 1.85 | 6.00 | 12.00 | 0.00 |
| {8153939/DGAT1=1}              | {8101992/SLC39A8=1} | 1.85 | 1.85 | 0.33 | 0.75 | 1.50 | 1.20 | 1.85 | 6.00 | 12.00 | 0.00 |

|                                                                        |                     |      |      |      |      |      |      |      |      |       |      |
|------------------------------------------------------------------------|---------------------|------|------|------|------|------|------|------|------|-------|------|
| {7895472/=2}                                                           | {8101992/SLC39A8=1} | 6.00 | 6.00 | 0.29 | 0.73 | 1.41 | 1.17 | 6.00 | 1.20 | 11.00 | 0.00 |
| {7928516/SAMD8=2}                                                      | {8101992/SLC39A8=1} | 1.88 | 1.88 | 0.59 | 0.85 | 2.44 | 1.35 | 1.88 | 1.20 | 11.00 | 0.00 |
| {7929201/BTAF1=2}                                                      | {8101992/SLC39A8=1} | 1.94 | 1.94 | 0.43 | 0.79 | 1.75 | 1.26 | 1.94 | 1.20 | 11.00 | 1.00 |
| {7940153/FAM111A=2}                                                    | {8101992/SLC39A8=1} | 1.94 | 1.94 | 0.62 | 0.86 | 2.63 | 1.37 | 1.94 | 1.20 | 12.00 | 0.00 |
| {7954419/ETNK1=2}                                                      | {8101992/SLC39A8=1} | 1.93 | 1.93 | 0.78 | 0.92 | 4.50 | 1.47 | 1.93 | 6.00 | 11.00 | 0.00 |
| {7968761/NAA16=2}                                                      | {8101992/SLC39A8=1} | 1.94 | 1.94 | 0.43 | 0.79 | 1.75 | 1.26 | 1.94 | 1.20 | 11.00 | 0.00 |
| {7995574/HNRNPA1 HNRNPA1L2 HNRNPA1P1<br>0 HNRNPA1P33 XKRX=2}           | {8101992/SLC39A8=1} | 1.90 | 1.87 | 0.59 | 0.85 | 2.44 | 1.35 | 1.90 | 1.20 | 11.00 | 0.00 |
| {8016745/SPAG9=2}                                                      | {8101992/SLC39A8=1} | 1.89 | 1.89 | 0.59 | 0.85 | 2.44 | 1.35 | 1.89 | 1.20 | 11.00 | 0.00 |
| {8022814/HNRNPA1 HNRNPA1L2 HNRNPA1P1<br>0 HNRNPA1P33 HNRNPA1P6 XKRX=2} | {8101992/SLC39A8=1} | 1.90 | 1.87 | 0.59 | 0.85 | 2.44 | 1.35 | 1.90 | 1.20 | 11.00 | 0.00 |
| {8034313/HNRNPA1 HNRNPA1L2 HNRNPA1P1<br>0 HNRNPA1P33 HNRNPA1P6 XKRX=2} | {8101992/SLC39A8=1} | 1.90 | 1.87 | 0.59 | 0.85 | 2.44 | 1.35 | 1.90 | 1.20 | 11.00 | 0.00 |
| {8038942/ZNF432=2}                                                     | {8101992/SLC39A8=1} | 1.94 | 1.94 | 0.78 | 0.92 | 4.50 | 1.47 | 1.94 | 1.20 | 11.00 | 0.00 |
| {8051622/SRSF7=2}                                                      | {8101992/SLC39A8=1} | 1.92 | 1.92 | 0.29 | 0.73 | 1.41 | 1.17 | 1.92 | 6.00 | 11.00 | 0.00 |
| {8055426/MCM6=2}                                                       | {8101992/SLC39A8=1} | 1.94 | 1.94 | 0.47 | 0.80 | 1.88 | 1.28 | 1.94 | 6.00 | 12.00 | 0.00 |
| {8106141/FCHO2=2}                                                      | {8101992/SLC39A8=1} | 1.90 | 1.90 | 0.47 | 0.80 | 1.88 | 1.28 | 1.90 | 1.20 | 12.00 | 0.00 |
| {8129045/HDAC2=2}                                                      | {8101992/SLC39A8=1} | 1.93 | 1.93 | 0.79 | 0.92 | 4.88 | 1.48 | 1.93 | 6.00 | 12.00 | 1.00 |
| {8147019/ZC2HC1A=2}                                                    | {8101992/SLC39A8=1} | 6.00 | 6.00 | 0.59 | 0.85 | 2.44 | 1.35 | 1.99 | 1.20 | 11.00 | 0.00 |
| {8154531/DENND4C=2}                                                    | {8101992/SLC39A8=1} | 1.89 | 1.89 | 0.59 | 0.85 | 2.44 | 1.35 | 1.89 | 1.20 | 11.00 | 0.00 |
| {8157216/UGCG=2}                                                       | {8101992/SLC39A8=1} | 1.89 | 1.89 | 0.59 | 0.85 | 2.44 | 1.35 | 1.89 | 6.00 | 11.00 | 0.00 |

|                     |                     |      |      |      |      |      |      |      |      |       |      |
|---------------------|---------------------|------|------|------|------|------|------|------|------|-------|------|
| {8180257/CEP170=2}  | {8101992/SLC39A8=1} | 6.00 | 1.94 | 0.43 | 0.79 | 1.75 | 1.26 | 1.94 | 1.20 | 11.00 | 0.00 |
| {8115327/SPARC=1}   | {8141094/PDK4=1}    | 1.68 | 1.68 | 0.49 | 0.79 | 1.94 | 1.35 | 1.68 | 1.20 | 11.00 | 0.00 |
| {8119466/MDFI=1}    | {8160297/PLIN2=1}   | 1.83 | 1.83 | 0.83 | 0.92 | 6.00 | 1.83 | 6.00 | 1.20 | 11.00 | 0.00 |
| {8127854/ME1=1}     | {7948344/GLYAT=2}   | 1.80 | 1.80 | 0.83 | 0.92 | 6.00 | 1.83 | 1.80 | 6.00 | 11.00 | 0.00 |
| {8131326/SLC29A4=1} | {8146000/ADAM9=1}   | 1.89 | 1.89 | 0.49 | 0.79 | 1.94 | 1.35 | 1.89 | 1.20 | 11.00 | 0.00 |
| {8146863/SULF1=2}   | {8138466/MACC1=1}   | 1.54 | 1.54 | 0.66 | 0.85 | 2.98 | 1.56 | 1.54 | 1.20 | 11.00 | 0.00 |
| {8153684/DGAT1=1}   | {8141094/PDK4=1}    | 1.71 | 1.71 | 0.40 | 0.75 | 1.67 | 1.29 | 1.71 | 6.00 | 12.00 | 0.00 |
| {8153939/DGAT1=1}   | {8141094/PDK4=1}    | 1.71 | 1.71 | 0.40 | 0.75 | 1.67 | 1.29 | 1.71 | 6.00 | 12.00 | 0.00 |
| {8180257/CEP170=2}  | {8141094/PDK4=1}    | 6.00 | 1.88 | 0.66 | 0.86 | 2.92 | 1.47 | 1.88 | 1.20 | 12.00 | 0.00 |
| {8153684/DGAT1=1}   | {8146000/ADAM9=1}   | 1.76 | 1.76 | 0.25 | 0.69 | 1.33 | 1.18 | 1.76 | 6.00 | 11.00 | 0.00 |
| {8153939/DGAT1=1}   | {8146000/ADAM9=1}   | 1.76 | 1.76 | 0.25 | 0.69 | 1.33 | 1.18 | 1.76 | 6.00 | 11.00 | 0.00 |
| {8158317/SPTAN1=1}  | {8146000/ADAM9=1}   | 1.52 | 1.52 | 0.36 | 0.73 | 1.56 | 1.26 | 1.52 | 6.00 | 11.00 | 0.00 |
| {8053484/ST3GAL5=2} | {8146000/ADAM9=1}   | 1.81 | 1.81 | 0.66 | 0.86 | 2.92 | 1.47 | 1.81 | 6.00 | 12.00 | 0.00 |
| {8106141/FCHO2=2}   | {8146000/ADAM9=1}   | 1.84 | 1.84 | 0.36 | 0.73 | 1.56 | 1.26 | 1.84 | 1.20 | 11.00 | 0.00 |
| {8140556/HGF=2}     | {8146000/ADAM9=1}   | 1.00 | 1.00 | 0.49 | 0.79 | 1.94 | 1.35 | 1.00 | 6.00 | 11.00 | 0.00 |
| {8153684/DGAT1=1}   | {7961673/GYS2=2}    | 1.83 | 1.83 | 0.32 | 0.69 | 1.47 | 1.27 | 1.83 | 6.00 | 11.00 | 0.00 |
| {8153684/DGAT1=1}   | {7981142/CLMN=2}    | 1.88 | 1.88 | 0.25 | 0.69 | 1.33 | 1.18 | 1.88 | 6.00 | 11.00 | 0.00 |
| {8153684/DGAT1=1}   | {8094679/KLB=2}     | 1.80 | 1.80 | 0.32 | 0.69 | 1.47 | 1.27 | 1.80 | 6.00 | 11.00 | 0.00 |
| {8153939/DGAT1=1}   | {7961673/GYS2=2}    | 1.83 | 1.83 | 0.32 | 0.69 | 1.47 | 1.27 | 1.83 | 6.00 | 11.00 | 0.00 |

|                                 |                      |      |      |      |      |      |      |      |      |       |      |
|---------------------------------|----------------------|------|------|------|------|------|------|------|------|-------|------|
| {8153939/DGAT1=1}               | {7981142/CLMN=2}     | 1.88 | 1.88 | 0.25 | 0.69 | 1.33 | 1.18 | 1.88 | 6.00 | 11.00 | 0.00 |
| {8153939/DGAT1=1}               | {8094679/KLB=2}      | 1.80 | 1.80 | 0.32 | 0.69 | 1.47 | 1.27 | 1.80 | 6.00 | 11.00 | 0.00 |
| {8053484/ST3GAL5=2}             | {8160297/PLIN2=1}    | 1.88 | 1.88 | 0.57 | 0.79 | 2.33 | 1.57 | 6.00 | 6.00 | 11.00 | 0.00 |
| {8101304/RASGEF1B=2}            | {8160297/PLIN2=1}    | 1.91 | 1.91 | 1.00 | 1.00 | Inf  | 2.00 | 6.00 | 1.20 | 11.00 | 0.00 |
| {8106252/HEXB=2}                | {8160297/PLIN2=1}    | 1.80 | 1.80 | 1.00 | 1.00 | Inf  | 2.00 | 6.00 | 6.00 | 11.00 | 0.00 |
| {7915207/PABPC4=2}              | {8033825/COL5A3=2}   | 1.86 | 1.86 | 0.66 | 0.85 | 2.98 | 1.56 | 1.86 | 6.00 | 11.00 | 0.00 |
| {8106141/FCHO2=2}               | {7919984/SELENBP1=2} | 1.86 | 1.86 | 0.51 | 0.73 | 2.03 | 1.60 | 1.86 | 1.20 | 11.00 | 0.00 |
| {7923141/DENND1B=2}             | {8033825/COL5A3=2}   | 1.86 | 1.86 | 0.66 | 0.85 | 2.98 | 1.56 | 1.86 | 6.00 | 11.00 | 0.00 |
| {8140468/GSAP=2}                | {7976795/MEG3=2}     | 6.00 | 6.00 | 0.49 | 0.79 | 1.94 | 1.35 | 6.00 | 1.20 | 11.00 | 0.00 |
| {8053484/ST3GAL5=2}             | {7981142/CLMN=2}     | 1.92 | 1.92 | 0.49 | 0.79 | 1.94 | 1.35 | 1.92 | 6.00 | 11.00 | 0.00 |
| {8102006/MANBA=2}               | {7981142/CLMN=2}     | 1.93 | 1.93 | 0.63 | 0.85 | 2.71 | 1.45 | 1.93 | 6.00 | 11.00 | 0.00 |
| {8180257/CEP170=2}              | {7981142/CLMN=2}     | 6.00 | 1.94 | 0.49 | 0.79 | 1.94 | 1.35 | 1.94 | 1.20 | 11.00 | 0.00 |
| {8102006/MANBA=2}               | {8033825/COL5A3=2}   | 1.84 | 1.84 | 0.66 | 0.85 | 2.98 | 1.56 | 1.84 | 6.00 | 11.00 | 0.00 |
| {8129649/SLC18B1=2}             | {8033825/COL5A3=2}   | 1.97 | 1.97 | 0.53 | 0.79 | 2.14 | 1.45 | 1.97 | 6.00 | 11.00 | 0.00 |
| {8154531/DENND4C=2}             | {8033825/COL5A3=2}   | 1.88 | 1.88 | 0.66 | 0.85 | 2.98 | 1.56 | 1.88 | 6.00 | 11.00 | 0.00 |
| {8180257/CEP170=2}              | {8094679/KLB=2}      | 6.00 | 1.95 | 0.53 | 0.79 | 2.14 | 1.45 | 1.95 | 1.20 | 11.00 | 0.00 |
| {8180257/CEP170=2}              | {8121405/C6orf183=2} | 6.00 | 6.00 | 0.49 | 0.79 | 1.94 | 1.35 | 6.00 | 1.20 | 11.00 | 0.00 |
| {8140468/GSAP=2}                | {8171172/MXRA5=2}    | 1.97 | 1.97 | 0.49 | 0.79 | 1.94 | 1.35 | 1.97 | 1.20 | 11.00 | 0.00 |
| {7897068/SKI=1,7912692/HSPB7=1} | {8146000/ADAM9=1}    | 1.90 | 1.90 | 0.80 | 0.92 | 5.00 | 1.57 | 1.90 | 1.20 | 11.00 | 1.00 |

|                                              |                     |      |      |      |      |      |      |      |      |       |      |
|----------------------------------------------|---------------------|------|------|------|------|------|------|------|------|-------|------|
| {7897068/SKI=1,7959298/TMEM120B=1}           | {8146000/ADAM9=1}   | 1.91 | 1.91 | 1.00 | 1.00 | Inf  | 1.71 | 1.91 | 1.20 | 12.00 | 1.00 |
| {7897068/SKI=1,8023995/FSTL3=1}              | {8146000/ADAM9=1}   | 1.58 | 1.58 | 1.00 | 1.00 | Inf  | 1.71 | 1.58 | 1.20 | 11.00 | 1.00 |
| {7897068/SKI=1,8034544/PRDX2=1}              | {8146000/ADAM9=1}   | 1.88 | 1.88 | 0.80 | 0.92 | 5.00 | 1.57 | 1.88 | 1.20 | 11.00 | 1.00 |
| {7897068/SKI=1,8053406/RETSAT=1}             | {8146000/ADAM9=1}   | 1.92 | 1.92 | 0.80 | 0.92 | 5.00 | 1.57 | 1.92 | 6.00 | 11.00 | 1.00 |
| {7897068/SKI=1,8067233/PMEPA1=1}             | {8146000/ADAM9=1}   | 1.62 | 1.62 | 0.80 | 0.92 | 5.00 | 1.57 | 1.62 | 1.20 | 11.00 | 1.00 |
| {7897068/SKI=1,8074388/SLC25A1=1}            | {8146000/ADAM9=1}   | 1.92 | 1.92 | 1.00 | 1.00 | Inf  | 1.71 | 1.92 | 1.20 | 11.00 | 1.00 |
| {7897068/SKI=1,8079746/TCTA=1}               | {8146000/ADAM9=1}   | 1.87 | 1.87 | 0.80 | 0.92 | 5.00 | 1.57 | 1.87 | 1.20 | 11.00 | 1.00 |
| {7897068/SKI=1,8131326/SLC29A4=1}            | {8146000/ADAM9=1}   | 1.96 | 1.96 | 1.00 | 1.00 | Inf  | 1.71 | 1.96 | 1.20 | 11.00 | 1.00 |
| {7897068/SKI=1,8153684/DGAT1=1}              | {8146000/ADAM9=1}   | 1.87 | 1.87 | 0.80 | 0.92 | 5.00 | 1.57 | 1.87 | 6.00 | 11.00 | 1.00 |
| {7897068/SKI=1,8153939/DGAT1=1}              | {8146000/ADAM9=1}   | 1.87 | 1.87 | 0.80 | 0.92 | 5.00 | 1.57 | 1.87 | 6.00 | 11.00 | 1.00 |
| {7897068/SKI=1,7912692/HSPB7=1}              | {7981142/CLMN=2}    | 1.92 | 1.92 | 0.80 | 0.92 | 5.00 | 1.57 | 1.92 | 1.20 | 11.00 | 1.00 |
| {7897068/SKI=1,7959298/TMEM120B=1}           | {7981142/CLMN=2}    | 1.91 | 1.91 | 0.80 | 0.92 | 5.00 | 1.57 | 1.91 | 1.20 | 11.00 | 1.00 |
| {7897068/SKI=1,8067233/PMEPA1=1}             | {7981142/CLMN=2}    | 1.89 | 1.89 | 0.80 | 0.92 | 5.00 | 1.57 | 1.89 | 1.20 | 11.00 | 1.00 |
| {7899173/DHDDS=1,7948344/GLYAT=1}            | {7948344/GLYAT=2}   | 1.83 | 1.83 | 1.00 | 1.00 | Inf  | 2.00 | 1.83 | 6.00 | 11.00 | 0.00 |
| {7899173/DHDDS=1,8016832/MMD=1}              | {7948344/GLYAT=2}   | 1.84 | 1.84 | 0.69 | 0.85 | 3.25 | 1.69 | 1.84 | 6.00 | 11.00 | 0.00 |
| {7899173/DHDDS=1,8023995/FSTL3=1}            | {7948344/GLYAT=2}   | 1.85 | 1.85 | 0.57 | 0.79 | 2.33 | 1.57 | 1.85 | 6.00 | 11.00 | 0.00 |
| {7899173/DHDDS=1,8127854/ME1=1}              | {7948344/GLYAT=2}   | 1.85 | 1.85 | 0.83 | 0.92 | 6.00 | 1.83 | 1.85 | 6.00 | 11.00 | 0.00 |
| {7899173/DHDDS=1,8053406/RETSAT=1}           | {8094679/KLB=2}     | 1.90 | 1.90 | 0.66 | 0.85 | 2.98 | 1.56 | 1.90 | 6.00 | 11.00 | 0.00 |
| {7912056/PLEKHG5 TNFRSF25=1,8011188/TLCD2=1} | {8180268/CYP51A1=1} | 6.00 | 1.97 | 1.00 | 1.00 | Inf  | 1.85 | 6.00 | 6.00 | 11.00 | 0.00 |



|                                        |                     |      |      |      |      |      |      |      |      |       |      |
|----------------------------------------|---------------------|------|------|------|------|------|------|------|------|-------|------|
| {7912692/HSPB7=1,8115327/SPARC=1}      | {8141094/PDK4=1}    | 1.83 | 1.83 | 1.00 | 1.00 | Inf  | 1.71 | 1.83 | 1.20 | 11.00 | 0.00 |
| {7912692/HSPB7=1,8153684/DGAT1=1}      | {8141094/PDK4=1}    | 1.88 | 1.88 | 0.80 | 0.92 | 5.00 | 1.57 | 1.88 | 6.00 | 11.00 | 0.00 |
| {7912692/HSPB7=1,8153939/DGAT1=1}      | {8141094/PDK4=1}    | 1.88 | 1.88 | 0.80 | 0.92 | 5.00 | 1.57 | 1.88 | 6.00 | 11.00 | 0.00 |
| {7959298/TMEM120B=1,7912692/HSPB7=1}   | {8146000/ADAM9=1}   | 1.94 | 1.94 | 1.00 | 1.00 | Inf  | 1.71 | 1.94 | 1.20 | 11.00 | 0.00 |
| {7912692/HSPB7=1,8067233/PMEPA1=1}     | {8146000/ADAM9=1}   | 1.91 | 1.91 | 0.80 | 0.92 | 5.00 | 1.57 | 1.91 | 1.20 | 11.00 | 0.00 |
| {7959298/TMEM120B=1,7912692/HSPB7=1}   | {7981142/CLMN=2}    | 1.94 | 1.94 | 1.00 | 1.00 | Inf  | 1.71 | 1.94 | 1.20 | 11.00 | 0.00 |
| {7912692/HSPB7=1,8067233/PMEPA1=1}     | {7981142/CLMN=2}    | 1.93 | 1.93 | 0.80 | 0.92 | 5.00 | 1.57 | 1.93 | 1.20 | 11.00 | 0.00 |
| {7928872/SNCG=1,8109305/SYNPO=1}       | {8101992/SLC39A8=1} | 1.93 | 1.93 | 0.43 | 0.79 | 1.75 | 1.26 | 1.93 | 1.20 | 11.00 | 0.00 |
| {7936322/GPAM=1,8119466/MDFI=1}        | {8160297/PLIN2=1}   | 1.84 | 1.84 | 0.83 | 0.92 | 6.00 | 1.83 | 6.00 | 6.00 | 11.00 | 0.00 |
| {8016832/MMD=1,7948344/GLYAT=1}        | {7948344/GLYAT=2}   | 1.84 | 1.84 | 1.00 | 1.00 | Inf  | 2.00 | 1.84 | 1.20 | 11.00 | 0.00 |
| {8023995/FSTL3=1,7948344/GLYAT=1}      | {7948344/GLYAT=2}   | 1.78 | 1.78 | 1.00 | 1.00 | Inf  | 2.00 | 1.78 | 1.20 | 11.00 | 0.00 |
| {8127854/ME1=1,7948344/GLYAT=1}        | {7948344/GLYAT=2}   | 1.80 | 1.80 | 1.00 | 1.00 | Inf  | 2.00 | 1.80 | 6.00 | 11.00 | 0.00 |
| {8023995/FSTL3=1,7959298/TMEM120B=1}   | {8146000/ADAM9=1}   | 1.92 | 1.92 | 0.80 | 0.92 | 5.00 | 1.57 | 1.92 | 1.20 | 11.00 | 0.00 |
| {7959298/TMEM120B=1,8034544/PRDX2=1}   | {8146000/ADAM9=1}   | 1.94 | 1.94 | 1.00 | 1.00 | Inf  | 1.71 | 1.94 | 1.20 | 11.00 | 0.00 |
| {7959298/TMEM120B=1,8053406/RETSAT=1}  | {8146000/ADAM9=1}   | 1.94 | 1.94 | 1.00 | 1.00 | Inf  | 1.71 | 1.94 | 6.00 | 11.00 | 0.00 |
| {7959298/TMEM120B=1,8067233/PMEPA1=1}  | {8146000/ADAM9=1}   | 1.90 | 1.90 | 0.80 | 0.92 | 5.00 | 1.57 | 1.90 | 1.20 | 11.00 | 0.00 |
| {7959298/TMEM120B=1,8074388/SLC25A1=1} | {8146000/ADAM9=1}   | 1.93 | 1.93 | 1.00 | 1.00 | Inf  | 1.71 | 1.93 | 1.20 | 11.00 | 0.00 |
| {7959298/TMEM120B=1,8079746/TCTA=1}    | {8146000/ADAM9=1}   | 1.92 | 1.92 | 0.80 | 0.92 | 5.00 | 1.57 | 1.92 | 1.20 | 11.00 | 0.00 |
| {7959298/TMEM120B=1,8131326/SLC29A4=1} | {8146000/ADAM9=1}   | 1.94 | 1.94 | 1.00 | 1.00 | Inf  | 1.71 | 1.94 | 1.20 | 11.00 | 0.00 |

|                                       |                     |      |      |      |      |      |      |      |      |       |      |
|---------------------------------------|---------------------|------|------|------|------|------|------|------|------|-------|------|
| {7959298/TMEM120B=1,8153684/DGAT1=1}  | {8146000/ADAM9=1}   | 1.90 | 1.90 | 1.00 | 1.00 | Inf  | 1.71 | 1.90 | 6.00 | 11.00 | 0.00 |
| {7959298/TMEM120B=1,8153939/DGAT1=1}  | {8146000/ADAM9=1}   | 1.90 | 1.90 | 1.00 | 1.00 | Inf  | 1.71 | 1.90 | 6.00 | 11.00 | 0.00 |
| {7959298/TMEM120B=1,8067233/PMEPA1=1} | {8160297/PLIN2=1}   | 1.93 | 1.93 | 0.83 | 0.92 | 6.00 | 1.83 | 6.00 | 1.20 | 11.00 | 0.00 |
| {7959298/TMEM120B=1,8067233/PMEPA1=1} | {7981142/CLMN=2}    | 1.90 | 1.90 | 0.80 | 0.92 | 5.00 | 1.57 | 1.90 | 1.20 | 11.00 | 0.00 |
| {8016033/FAM171A2=1,8034544/PRDX2=1}  | {8101992/SLC39A8=1} | 6.00 | 1.99 | 0.29 | 0.73 | 1.41 | 1.17 | 6.00 | 1.20 | 11.00 | 0.00 |
| {8023995/FSTL3=1,8016832/MMD=1}       | {7948344/GLYAT=2}   | 1.86 | 1.86 | 0.69 | 0.85 | 3.25 | 1.69 | 1.86 | 1.20 | 11.00 | 0.00 |
| {8127854/ME1=1,8016832/MMD=1}         | {7948344/GLYAT=2}   | 1.86 | 1.86 | 1.00 | 1.00 | Inf  | 2.00 | 1.86 | 6.00 | 11.00 | 0.00 |
| {8023995/FSTL3=1,8053406/RETSAT=1}    | {8146000/ADAM9=1}   | 1.92 | 1.92 | 0.63 | 0.85 | 2.71 | 1.45 | 1.92 | 6.00 | 11.00 | 0.00 |
| {8023995/FSTL3=1,8131326/SLC29A4=1}   | {8146000/ADAM9=1}   | 1.97 | 1.97 | 0.63 | 0.85 | 2.71 | 1.45 | 1.97 | 1.20 | 11.00 | 0.00 |
| {8023995/FSTL3=1,8127854/ME1=1}       | {7948344/GLYAT=2}   | 1.86 | 1.86 | 1.00 | 1.00 | Inf  | 2.00 | 1.86 | 6.00 | 11.00 | 0.00 |
| {8024323/REEP6=1,8034544/PRDX2=1}     | {8101992/SLC39A8=1} | 1.95 | 1.95 | 0.59 | 0.85 | 2.44 | 1.35 | 1.95 | 1.20 | 11.00 | 0.00 |
| {8024323/REEP6=1,8074388/SLC25A1=1}   | {8101992/SLC39A8=1} | 1.91 | 1.91 | 0.59 | 0.85 | 2.44 | 1.35 | 1.91 | 1.20 | 11.00 | 0.00 |
| {8024323/REEP6=1,8153684/DGAT1=1}     | {8101992/SLC39A8=1} | 1.90 | 1.90 | 0.47 | 0.80 | 1.88 | 1.28 | 1.90 | 6.00 | 12.00 | 0.00 |
| {8024323/REEP6=1,8153939/DGAT1=1}     | {8101992/SLC39A8=1} | 1.90 | 1.90 | 0.47 | 0.80 | 1.88 | 1.28 | 1.90 | 6.00 | 12.00 | 0.00 |
| {8024323/REEP6=1,8153684/DGAT1=1}     | {8141094/PDK4=1}    | 1.87 | 1.87 | 0.36 | 0.73 | 1.56 | 1.26 | 1.87 | 6.00 | 11.00 | 0.00 |
| {8024323/REEP6=1,8153939/DGAT1=1}     | {8141094/PDK4=1}    | 1.87 | 1.87 | 0.36 | 0.73 | 1.56 | 1.26 | 1.87 | 6.00 | 11.00 | 0.00 |
| {8024323/REEP6=1,8180257/CEP170=2}    | {8141094/PDK4=1}    | 6.00 | 1.90 | 0.63 | 0.85 | 2.71 | 1.45 | 1.90 | 1.20 | 11.00 | 0.00 |
| {8024323/REEP6=1,8153684/DGAT1=1}     | {8094679/KLB=2}     | 1.91 | 1.91 | 0.42 | 0.73 | 1.72 | 1.35 | 1.91 | 6.00 | 11.00 | 0.00 |
| {8024323/REEP6=1,8153939/DGAT1=1}     | {8094679/KLB=2}     | 1.91 | 1.91 | 0.42 | 0.73 | 1.72 | 1.35 | 1.91 | 6.00 | 11.00 | 0.00 |

|                                                                                    |                     |      |      |      |      |      |      |      |      |       |      |
|------------------------------------------------------------------------------------|---------------------|------|------|------|------|------|------|------|------|-------|------|
| {8034544/PRDX2=1,8074388/SLC25A1=1}                                                | {8101992/SLC39A8=1} | 1.95 | 1.95 | 0.59 | 0.85 | 2.44 | 1.35 | 1.95 | 1.20 | 11.00 | 0.00 |
| {8131326/SLC29A4=1,8034544/PRDX2=1}                                                | {8101992/SLC39A8=1} | 1.97 | 1.97 | 0.59 | 0.85 | 2.44 | 1.35 | 1.97 | 1.20 | 11.00 | 0.00 |
| {8153684/DGAT1=1,8034544/PRDX2=1}                                                  | {8101992/SLC39A8=1} | 1.93 | 1.93 | 0.43 | 0.79 | 1.75 | 1.26 | 1.93 | 6.00 | 11.00 | 0.00 |
| {8034544/PRDX2=1,8153939/DGAT1=1}                                                  | {8101992/SLC39A8=1} | 1.93 | 1.93 | 0.43 | 0.79 | 1.75 | 1.26 | 1.93 | 6.00 | 11.00 | 0.00 |
| {8153684/DGAT1=1,8034783/ADGRL1=1}                                                 | {8141094/PDK4=1}    | 1.91 | 1.91 | 0.49 | 0.79 | 1.94 | 1.35 | 1.91 | 6.00 | 11.00 | 0.00 |
| {8034783/ADGRL1=1,8153939/DGAT1=1}                                                 | {8141094/PDK4=1}    | 1.91 | 1.91 | 0.49 | 0.79 | 1.94 | 1.35 | 1.91 | 6.00 | 11.00 | 0.00 |
| {8131326/SLC29A4=1,8053406/RETSAT=1}                                               | {8146000/ADAM9=1}   | 1.96 | 1.96 | 0.63 | 0.85 | 2.71 | 1.45 | 1.96 | 6.00 | 11.00 | 0.00 |
| {8153684/DGAT1=1,8074388/SLC25A1=1}                                                | {8101992/SLC39A8=1} | 1.89 | 1.89 | 0.43 | 0.79 | 1.75 | 1.26 | 1.89 | 6.00 | 11.00 | 0.00 |
| {8153939/DGAT1=1,8074388/SLC25A1=1}                                                | {8101992/SLC39A8=1} | 1.89 | 1.89 | 0.43 | 0.79 | 1.75 | 1.26 | 1.89 | 6.00 | 11.00 | 0.00 |
| {8153684/DGAT1=1,8074388/SLC25A1=1}                                                | {8146000/ADAM9=1}   | 1.87 | 1.87 | 0.49 | 0.79 | 1.94 | 1.35 | 1.87 | 6.00 | 11.00 | 0.00 |
| {8153939/DGAT1=1,8074388/SLC25A1=1}                                                | {8146000/ADAM9=1}   | 1.87 | 1.87 | 0.49 | 0.79 | 1.94 | 1.35 | 1.87 | 6.00 | 11.00 | 0.00 |
| {8116653/TUBB2A=1,8116649/TUBB2A=1}                                                | {8101992/SLC39A8=1} | 1.94 | 1.94 | 0.43 | 0.79 | 1.75 | 1.26 | 1.94 | 6.00 | 11.00 | 0.00 |
| {8153684/DGAT1=1,8153939/DGAT1=1}                                                  | {8101992/SLC39A8=1} | 1.85 | 1.85 | 0.33 | 0.75 | 1.50 | 1.20 | 1.85 | 6.00 | 12.00 | 0.00 |
| {8022814/HNRNPA1 HNRNPA1L2 HNRNPA1P10 HNRNPA1P33 HNRNPA1P6 XKRX=2,7928516/SAMD8=2} | {8101992/SLC39A8=1} | 1.93 | 1.90 | 0.78 | 0.92 | 4.50 | 1.47 | 1.93 | 1.20 | 11.00 | 0.00 |
| {7929201/BTAF1=2,7940153/FAM111A=2}                                                | {8101992/SLC39A8=1} | 1.94 | 1.94 | 0.78 | 0.92 | 4.50 | 1.47 | 1.94 | 1.20 | 11.00 | 1.00 |
| {7929201/BTAF1=2,8106141/FCHO2=2}                                                  | {8101992/SLC39A8=1} | 1.95 | 1.95 | 0.59 | 0.85 | 2.44 | 1.35 | 1.95 | 1.20 | 11.00 | 1.00 |
| {7954419/ETNK1=2,7940153/FAM111A=2}                                                | {8101992/SLC39A8=1} | 1.94 | 1.94 | 1.00 | 1.00 | Inf  | 1.60 | 1.94 | 6.00 | 11.00 | 0.00 |
| {7940153/FAM111A=2,8106141/FCHO2=2}                                                | {8101992/SLC39A8=1} | 1.95 | 1.95 | 0.79 | 0.92 | 4.88 | 1.48 | 1.95 | 1.20 | 12.00 | 0.00 |

|                                                                                                                           |                     |      |      |      |      |      |      |      |      |       |      |
|---------------------------------------------------------------------------------------------------------------------------|---------------------|------|------|------|------|------|------|------|------|-------|------|
| {7954419/ETNK1=2,8106141/FCHO2=2}                                                                                         | {8101992/SLC39A8=1} | 1.93 | 1.93 | 0.78 | 0.92 | 4.50 | 1.47 | 1.93 | 6.00 | 11.00 | 0.00 |
| {8034313/HNRNPA1 HNRNPA1L2 HNRNPA1P10 HNRNPA1P33 HNRNPA1P6 XKRX=2,7995574/HNRNPA1 HNRNPA1L2 HNRNPA1P10 HNRNPA1P33 XKRX=2} | {8101992/SLC39A8=1} | 1.90 | 1.87 | 0.59 | 0.85 | 2.44 | 1.35 | 1.90 | 1.20 | 11.00 | 0.00 |
| {8153684/DGAT1=1,8115327/SPARC=1}                                                                                         | {8141094/PDK4=1}    | 1.86 | 1.86 | 0.80 | 0.92 | 5.00 | 1.57 | 1.86 | 6.00 | 11.00 | 0.00 |
| {8115327/SPARC=1,8153939/DGAT1=1}                                                                                         | {8141094/PDK4=1}    | 1.86 | 1.86 | 0.80 | 0.92 | 5.00 | 1.57 | 1.86 | 6.00 | 11.00 | 0.00 |
| {8153684/DGAT1=1,8153939/DGAT1=1}                                                                                         | {8141094/PDK4=1}    | 1.71 | 1.71 | 0.40 | 0.75 | 1.67 | 1.29 | 1.71 | 6.00 | 12.00 | 0.00 |
| {8153684/DGAT1=1,8180257/CEP170=2}                                                                                        | {8141094/PDK4=1}    | 6.00 | 1.89 | 0.63 | 0.85 | 2.71 | 1.45 | 1.89 | 6.00 | 11.00 | 0.00 |
| {8153939/DGAT1=1,8180257/CEP170=2}                                                                                        | {8141094/PDK4=1}    | 6.00 | 1.89 | 0.63 | 0.85 | 2.71 | 1.45 | 1.89 | 6.00 | 11.00 | 0.00 |
| {8153684/DGAT1=1,8153939/DGAT1=1}                                                                                         | {8146000/ADAM9=1}   | 1.76 | 1.76 | 0.25 | 0.69 | 1.33 | 1.18 | 1.76 | 6.00 | 11.00 | 0.00 |
| {8153684/DGAT1=1,8153939/DGAT1=1}                                                                                         | {7961673/GYS2=2}    | 1.83 | 1.83 | 0.32 | 0.69 | 1.47 | 1.27 | 1.83 | 6.00 | 11.00 | 0.00 |
| {8153684/DGAT1=1,8153939/DGAT1=1}                                                                                         | {7981142/CLMN=2}    | 1.88 | 1.88 | 0.25 | 0.69 | 1.33 | 1.18 | 1.88 | 6.00 | 11.00 | 0.00 |
| {8153684/DGAT1=1,8153939/DGAT1=1}                                                                                         | {8094679/KLB=2}     | 1.80 | 1.80 | 0.32 | 0.69 | 1.47 | 1.27 | 1.80 | 6.00 | 11.00 | 0.00 |
| {8129649/SLC18B1=2,8154531/DENND4C=2}                                                                                     | {8033825/COL5A3=2}  | 1.97 | 1.97 | 0.82 | 0.92 | 5.50 | 1.69 | 1.97 | 6.00 | 11.00 | 0.00 |
| {7897068/SKI=1,7959298/TMEM120B=1,7912692/HSPB7=1}                                                                        | {8146000/ADAM9=1}   | 1.94 | 1.94 | 1.00 | 1.00 | Inf  | 1.71 | 1.94 | 1.20 | 11.00 | 1.00 |
| {7897068/SKI=1,7912692/HSPB7=1,8067233/PMEPA1=1}                                                                          | {8146000/ADAM9=1}   | 1.91 | 1.91 | 0.80 | 0.92 | 5.00 | 1.57 | 1.91 | 1.20 | 11.00 | 1.00 |
| {7897068/SKI=1,8023995/FSTL3=1,7959298/TMEM120B=1}                                                                        | {8146000/ADAM9=1}   | 1.92 | 1.92 | 1.00 | 1.00 | Inf  | 1.71 | 1.92 | 1.20 | 11.00 | 1.00 |
| {7897068/SKI=1,7959298/TMEM120B=1,8034544/PRDX2=1}                                                                        | {8146000/ADAM9=1}   | 1.94 | 1.94 | 1.00 | 1.00 | Inf  | 1.71 | 1.94 | 1.20 | 11.00 | 1.00 |
| {7897068/SKI=1,7959298/TMEM120B=1,8053406/RETSAT=1}                                                                       | {8146000/ADAM9=1}   | 1.95 | 1.95 | 1.00 | 1.00 | Inf  | 1.71 | 1.95 | 6.00 | 11.00 | 1.00 |

|                                                      |                   |      |      |      |      |      |      |      |      |       |      |
|------------------------------------------------------|-------------------|------|------|------|------|------|------|------|------|-------|------|
| {7897068/SKI=1,7959298/TMEM120B=1,8067233/PMEPA1=1}  | {8146000/ADAM9=1} | 1.93 | 1.93 | 1.00 | 1.00 | Inf  | 1.71 | 1.93 | 1.20 | 11.00 | 1.00 |
| {7897068/SKI=1,7959298/TMEM120B=1,8074388/SLC25A1=1} | {8146000/ADAM9=1} | 1.95 | 1.95 | 1.00 | 1.00 | Inf  | 1.71 | 1.95 | 1.20 | 11.00 | 1.00 |
| {7897068/SKI=1,7959298/TMEM120B=1,8079746/TCTA=1}    | {8146000/ADAM9=1} | 1.94 | 1.94 | 1.00 | 1.00 | Inf  | 1.71 | 1.94 | 1.20 | 11.00 | 1.00 |
| {7897068/SKI=1,7959298/TMEM120B=1,8131326/SLC29A4=1} | {8146000/ADAM9=1} | 1.97 | 1.97 | 1.00 | 1.00 | Inf  | 1.71 | 1.97 | 1.20 | 11.00 | 1.00 |
| {7897068/SKI=1,7959298/TMEM120B=1,8153684/DGAT1=1}   | {8146000/ADAM9=1} | 1.93 | 1.93 | 1.00 | 1.00 | Inf  | 1.71 | 1.93 | 6.00 | 11.00 | 1.00 |
| {7897068/SKI=1,7959298/TMEM120B=1,8153939/DGAT1=1}   | {8146000/ADAM9=1} | 1.93 | 1.93 | 1.00 | 1.00 | Inf  | 1.71 | 1.93 | 6.00 | 11.00 | 1.00 |
| {7897068/SKI=1,8023995/FSTL3=1,8053406/RETSAT=1}     | {8146000/ADAM9=1} | 1.92 | 1.92 | 1.00 | 1.00 | Inf  | 1.71 | 1.92 | 6.00 | 11.00 | 1.00 |
| {7897068/SKI=1,8023995/FSTL3=1,8131326/SLC29A4=1}    | {8146000/ADAM9=1} | 1.97 | 1.97 | 1.00 | 1.00 | Inf  | 1.71 | 1.97 | 1.20 | 11.00 | 1.00 |
| {7897068/SKI=1,8131326/SLC29A4=1,8053406/RETSAT=1}   | {8146000/ADAM9=1} | 1.97 | 1.97 | 1.00 | 1.00 | Inf  | 1.71 | 1.97 | 6.00 | 11.00 | 1.00 |
| {7897068/SKI=1,8153684/DGAT1=1,8074388/SLC25A1=1}    | {8146000/ADAM9=1} | 1.92 | 1.92 | 1.00 | 1.00 | Inf  | 1.71 | 1.92 | 6.00 | 11.00 | 1.00 |
| {7897068/SKI=1,8153939/DGAT1=1,8074388/SLC25A1=1}    | {8146000/ADAM9=1} | 1.92 | 1.92 | 1.00 | 1.00 | Inf  | 1.71 | 1.92 | 6.00 | 11.00 | 1.00 |
| {7897068/SKI=1,8153684/DGAT1=1,8153939/DGAT1=1}      | {8146000/ADAM9=1} | 1.87 | 1.87 | 0.80 | 0.92 | 5.00 | 1.57 | 1.87 | 6.00 | 11.00 | 1.00 |
| {7897068/SKI=1,7959298/TMEM120B=1,7912692/HSPB7=1}   | {7981142/CLMN=2}  | 1.94 | 1.94 | 1.00 | 1.00 | Inf  | 1.71 | 1.94 | 1.20 | 11.00 | 1.00 |
| {7897068/SKI=1,7912692/HSPB7=1,8067233/PMEPA1=1}     | {7981142/CLMN=2}  | 1.93 | 1.93 | 0.80 | 0.92 | 5.00 | 1.57 | 1.93 | 1.20 | 11.00 | 1.00 |
| {7897068/SKI=1,7959298/TMEM120B=1,8067233/PMEPA1=1}  | {7981142/CLMN=2}  | 1.93 | 1.93 | 1.00 | 1.00 | Inf  | 1.71 | 1.93 | 1.20 | 11.00 | 1.00 |
| {7899173/DHDDS=1,8016832/MMD=1,7948344/GLYAT=1}      | {7948344/GLYAT=2} | 1.84 | 1.84 | 1.00 | 1.00 | Inf  | 2.00 | 1.84 | 6.00 | 11.00 | 0.00 |

|                                                         |                   |      |      |      |      |      |      |      |      |       |      |
|---------------------------------------------------------|-------------------|------|------|------|------|------|------|------|------|-------|------|
| {7899173/DHDDS=1,8023995/FSTL3=1,7948344/GLYAT=1}       | {7948344/GLYAT=2} | 1.85 | 1.85 | 1.00 | 1.00 | Inf  | 2.00 | 1.85 | 6.00 | 11.00 | 0.00 |
| {7899173/DHDDS=1,8127854/ME1=1,7948344/GLYAT=1}         | {7948344/GLYAT=2} | 1.85 | 1.85 | 1.00 | 1.00 | Inf  | 2.00 | 1.85 | 6.00 | 11.00 | 0.00 |
| {7899173/DHDDS=1,8023995/FSTL3=1,8016832/MMD=1}         | {7948344/GLYAT=2} | 1.86 | 1.86 | 0.69 | 0.85 | 3.25 | 1.69 | 1.86 | 6.00 | 11.00 | 0.00 |
| {7899173/DHDDS=1,8127854/ME1=1,8016832/MMD=1}           | {7948344/GLYAT=2} | 1.86 | 1.86 | 1.00 | 1.00 | Inf  | 2.00 | 1.86 | 6.00 | 11.00 | 0.00 |
| {7899173/DHDDS=1,8023995/FSTL3=1,8127854/ME1=1}         | {7948344/GLYAT=2} | 1.87 | 1.87 | 1.00 | 1.00 | Inf  | 2.00 | 1.87 | 6.00 | 11.00 | 0.00 |
| {7912692/HSPB7=1,8153684/DGAT1=1,8115327/SPARC=1}       | {8141094/PDK4=1}  | 1.88 | 1.88 | 1.00 | 1.00 | Inf  | 1.71 | 1.88 | 6.00 | 11.00 | 0.00 |
| {7912692/HSPB7=1,8115327/SPARC=1,8153939/DGAT1=1}       | {8141094/PDK4=1}  | 1.88 | 1.88 | 1.00 | 1.00 | Inf  | 1.71 | 1.88 | 6.00 | 11.00 | 0.00 |
| {7912692/HSPB7=1,8153684/DGAT1=1,8153939/DGAT1=1}       | {8141094/PDK4=1}  | 1.88 | 1.88 | 0.80 | 0.92 | 5.00 | 1.57 | 1.88 | 6.00 | 11.00 | 0.00 |
| {7959298/TMEM120B=1,7912692/HSPB7=1,8067233/PMEPA1=1}   | {8146000/ADAM9=1} | 1.94 | 1.94 | 1.00 | 1.00 | Inf  | 1.71 | 1.94 | 1.20 | 11.00 | 0.00 |
| {7959298/TMEM120B=1,7912692/HSPB7=1,8067233/PMEPA1=1}   | {7981142/CLMN=2}  | 1.94 | 1.94 | 1.00 | 1.00 | Inf  | 1.71 | 1.94 | 1.20 | 11.00 | 0.00 |
| {8023995/FSTL3=1,8016832/MMD=1,7948344/GLYAT=1}         | {7948344/GLYAT=2} | 1.86 | 1.86 | 1.00 | 1.00 | Inf  | 2.00 | 1.86 | 1.20 | 11.00 | 0.00 |
| {8127854/ME1=1,8016832/MMD=1,7948344/GLYAT=1}           | {7948344/GLYAT=2} | 1.86 | 1.86 | 1.00 | 1.00 | Inf  | 2.00 | 1.86 | 6.00 | 11.00 | 0.00 |
| {8023995/FSTL3=1,8127854/ME1=1,7948344/GLYAT=1}         | {7948344/GLYAT=2} | 1.86 | 1.86 | 1.00 | 1.00 | Inf  | 2.00 | 1.86 | 6.00 | 11.00 | 0.00 |
| {8023995/FSTL3=1,7959298/TMEM120B=1,8053406/RETSAT=1}   | {8146000/ADAM9=1} | 1.95 | 1.95 | 1.00 | 1.00 | Inf  | 1.71 | 1.95 | 6.00 | 11.00 | 0.00 |
| {8023995/FSTL3=1,7959298/TMEM120B=1,8131326/SLC29A4=1}  | {8146000/ADAM9=1} | 1.97 | 1.97 | 1.00 | 1.00 | Inf  | 1.71 | 1.97 | 1.20 | 11.00 | 0.00 |
| {7959298/TMEM120B=1,8131326/SLC29A4=1,8053406/RETSAT=1} | {8146000/ADAM9=1} | 1.96 | 1.96 | 1.00 | 1.00 | Inf  | 1.71 | 1.96 | 6.00 | 11.00 | 0.00 |

|                                                        |                     |      |      |      |      |      |      |      |      |       |      |
|--------------------------------------------------------|---------------------|------|------|------|------|------|------|------|------|-------|------|
| {7959298/TMEM120B=1,8153684/DGAT1=1,8074388/SLC25A1=1} | {8146000/ADAM9=1}   | 1.93 | 1.93 | 1.00 | 1.00 | Inf  | 1.71 | 1.93 | 6.00 | 11.00 | 0.00 |
| {7959298/TMEM120B=1,8153939/DGAT1=1,8074388/SLC25A1=1} | {8146000/ADAM9=1}   | 1.93 | 1.93 | 1.00 | 1.00 | Inf  | 1.71 | 1.93 | 6.00 | 11.00 | 0.00 |
| {7959298/TMEM120B=1,8153684/DGAT1=1,8153939/DGAT1=1}   | {8146000/ADAM9=1}   | 1.90 | 1.90 | 1.00 | 1.00 | Inf  | 1.71 | 1.90 | 6.00 | 11.00 | 0.00 |
| {8023995/FSTL3=1,8127854/ME1=1,8016832/MMD=1}          | {7948344/GLYAT=2}   | 1.88 | 1.88 | 1.00 | 1.00 | Inf  | 2.00 | 1.88 | 6.00 | 11.00 | 0.00 |
| {8023995/FSTL3=1,8131326/SLC29A4=1,8053406/RETSAT=1}   | {8146000/ADAM9=1}   | 1.97 | 1.97 | 0.63 | 0.85 | 2.71 | 1.45 | 1.97 | 6.00 | 11.00 | 0.00 |
| {8024323/REEP6=1,8034544/PRDX2=1,8074388/SLC25A1=1}    | {8101992/SLC39A8=1} | 1.96 | 1.96 | 0.78 | 0.92 | 4.50 | 1.47 | 1.96 | 1.20 | 11.00 | 0.00 |
| {8024323/REEP6=1,8153684/DGAT1=1,8034544/PRDX2=1}      | {8101992/SLC39A8=1} | 1.95 | 1.95 | 0.59 | 0.85 | 2.44 | 1.35 | 1.95 | 6.00 | 11.00 | 0.00 |
| {8024323/REEP6=1,8034544/PRDX2=1,8153939/DGAT1=1}      | {8101992/SLC39A8=1} | 1.95 | 1.95 | 0.59 | 0.85 | 2.44 | 1.35 | 1.95 | 6.00 | 11.00 | 0.00 |
| {8024323/REEP6=1,8153684/DGAT1=1,8074388/SLC25A1=1}    | {8101992/SLC39A8=1} | 1.91 | 1.91 | 0.59 | 0.85 | 2.44 | 1.35 | 1.91 | 6.00 | 11.00 | 0.00 |
| {8024323/REEP6=1,8153939/DGAT1=1,8074388/SLC25A1=1}    | {8101992/SLC39A8=1} | 1.91 | 1.91 | 0.59 | 0.85 | 2.44 | 1.35 | 1.91 | 6.00 | 11.00 | 0.00 |
| {8024323/REEP6=1,8153684/DGAT1=1,8153939/DGAT1=1}      | {8101992/SLC39A8=1} | 1.90 | 1.90 | 0.47 | 0.80 | 1.88 | 1.28 | 1.90 | 6.00 | 12.00 | 0.00 |
| {8024323/REEP6=1,8153684/DGAT1=1,8153939/DGAT1=1}      | {8141094/PDK4=1}    | 1.87 | 1.87 | 0.36 | 0.73 | 1.56 | 1.26 | 1.87 | 6.00 | 11.00 | 0.00 |
| {8024323/REEP6=1,8153684/DGAT1=1,8180257/CEP170=2}     | {8141094/PDK4=1}    | 6.00 | 1.90 | 0.63 | 0.85 | 2.71 | 1.45 | 1.90 | 6.00 | 11.00 | 0.00 |
| {8024323/REEP6=1,8153939/DGAT1=1,8180257/CEP170=2}     | {8141094/PDK4=1}    | 6.00 | 1.90 | 0.63 | 0.85 | 2.71 | 1.45 | 1.90 | 6.00 | 11.00 | 0.00 |
| {8024323/REEP6=1,8153684/DGAT1=1,8153939/DGAT1=1}      | {8094679/KLB=2}     | 1.91 | 1.91 | 0.42 | 0.73 | 1.72 | 1.35 | 1.91 | 6.00 | 11.00 | 0.00 |
| {8153684/DGAT1=1,8034544/PRDX2=1,8074388/SLC25A1=1}    | {8101992/SLC39A8=1} | 1.95 | 1.95 | 0.59 | 0.85 | 2.44 | 1.35 | 1.95 | 6.00 | 11.00 | 0.00 |

|                                                                       |                     |      |      |      |      |      |      |      |      |       |      |
|-----------------------------------------------------------------------|---------------------|------|------|------|------|------|------|------|------|-------|------|
| {8034544/PRDX2=1,8153939/DGAT1=1,8074388/SLC25A1=1}                   | {8101992/SLC39A8=1} | 1.95 | 1.95 | 0.59 | 0.85 | 2.44 | 1.35 | 1.95 | 6.00 | 11.00 | 0.00 |
| {8153684/DGAT1=1,8034544/PRDX2=1,8153939/DGAT1=1}                     | {8101992/SLC39A8=1} | 1.93 | 1.93 | 0.43 | 0.79 | 1.75 | 1.26 | 1.93 | 6.00 | 11.00 | 0.00 |
| {8153684/DGAT1=1,8034783/ADGRL1=1,8153939/DGAT1=1}                    | {8141094/PDK4=1}    | 1.91 | 1.91 | 0.49 | 0.79 | 1.94 | 1.35 | 1.91 | 6.00 | 11.00 | 0.00 |
| {8153684/DGAT1=1,8153939/DGAT1=1,8074388/SLC25A1=1}                   | {8101992/SLC39A8=1} | 1.89 | 1.89 | 0.43 | 0.79 | 1.75 | 1.26 | 1.89 | 6.00 | 11.00 | 0.00 |
| {8153684/DGAT1=1,8153939/DGAT1=1,8074388/SLC25A1=1}                   | {8146000/ADAM9=1}   | 1.87 | 1.87 | 0.49 | 0.79 | 1.94 | 1.35 | 1.87 | 6.00 | 11.00 | 0.00 |
| {7929201/BTAF1=2,7940153/FAM111A=2,8106141/FCHO2=2}                   | {8101992/SLC39A8=1} | 1.95 | 1.95 | 0.78 | 0.92 | 4.50 | 1.47 | 1.95 | 1.20 | 11.00 | 1.00 |
| {7954419/ETNK1=2,7940153/FAM111A=2,8106141/FCHO2=2}                   | {8101992/SLC39A8=1} | 1.95 | 1.95 | 1.00 | 1.00 | Inf  | 1.60 | 1.95 | 6.00 | 11.00 | 0.00 |
| {8153684/DGAT1=1,8115327/SPARC=1,8153939/DGAT1=1}                     | {8141094/PDK4=1}    | 1.86 | 1.86 | 0.80 | 0.92 | 5.00 | 1.57 | 1.86 | 6.00 | 11.00 | 0.00 |
| {8153684/DGAT1=1,8153939/DGAT1=1,8180257/CEP170=2}                    | {8141094/PDK4=1}    | 6.00 | 1.89 | 0.63 | 0.85 | 2.71 | 1.45 | 1.89 | 6.00 | 11.00 | 0.00 |
| {7897068/SKI=1,7959298/TMEM120B=1,7912692/HSPB7=1,8067233/PMEPA1=1}   | {8146000/ADAM9=1}   | 1.94 | 1.94 | 1.00 | 1.00 | Inf  | 1.71 | 1.94 | 1.20 | 11.00 | 1.00 |
| {7897068/SKI=1,8023995/FSTL3=1,7959298/TMEM120B=1,8053406/RETSAT=1}   | {8146000/ADAM9=1}   | 1.95 | 1.95 | 1.00 | 1.00 | Inf  | 1.71 | 1.95 | 6.00 | 11.00 | 1.00 |
| {7897068/SKI=1,8023995/FSTL3=1,7959298/TMEM120B=1,8131326/SLC29A4=1}  | {8146000/ADAM9=1}   | 1.97 | 1.97 | 1.00 | 1.00 | Inf  | 1.71 | 1.97 | 1.20 | 11.00 | 1.00 |
| {7897068/SKI=1,7959298/TMEM120B=1,8131326/SLC29A4=1,8053406/RETSAT=1} | {8146000/ADAM9=1}   | 1.97 | 1.97 | 1.00 | 1.00 | Inf  | 1.71 | 1.97 | 6.00 | 11.00 | 1.00 |
| {7897068/SKI=1,7959298/TMEM120B=1,8153684/DGAT1=1,8074388/SLC25A1=1}  | {8146000/ADAM9=1}   | 1.95 | 1.95 | 1.00 | 1.00 | Inf  | 1.71 | 1.95 | 6.00 | 11.00 | 1.00 |
| {7897068/SKI=1,7959298/TMEM120B=1,8153939/DGAT1=1,8074388/SLC25A1=1}  | {8146000/ADAM9=1}   | 1.95 | 1.95 | 1.00 | 1.00 | Inf  | 1.71 | 1.95 | 6.00 | 11.00 | 1.00 |
| {7897068/SKI=1,7959298/TMEM120B=1,8153684/DGAT1=1,8153939/DGAT1=1}    | {8146000/ADAM9=1}   | 1.93 | 1.93 | 1.00 | 1.00 | Inf  | 1.71 | 1.93 | 6.00 | 11.00 | 1.00 |



|                                                                         |                     |      |      |      |      |      |      |      |      |       |      |
|-------------------------------------------------------------------------|---------------------|------|------|------|------|------|------|------|------|-------|------|
| {7897068/SKI=1,8023995/FSTL3=1,8131326/SLC29A4=1,8053406/RETSAT=1}      | {8146000/ADAM9=1}   | 1.97 | 1.97 | 1.00 | 1.00 | Inf  | 1.71 | 1.97 | 6.00 | 11.00 | 1.00 |
| {7897068/SKI=1,8153684/DGAT1=1,8153939/DGAT1=1,8074388/SLC25A1=1}       | {8146000/ADAM9=1}   | 1.92 | 1.92 | 1.00 | 1.00 | Inf  | 1.71 | 1.92 | 6.00 | 11.00 | 1.00 |
| {7897068/SKI=1,7959298/TMEM120B=1,7912692/HSPB7=1,8067233/PMPEA1=1}     | {7981142/CLMN=2}    | 1.94 | 1.94 | 1.00 | 1.00 | Inf  | 1.71 | 1.94 | 1.20 | 11.00 | 1.00 |
| {7899173/DHDDS=1,8023995/FSTL3=1,8016832/MMD=1,7948344/GLYAT=1}         | {7948344/GLYAT=2}   | 1.86 | 1.86 | 1.00 | 1.00 | Inf  | 2.00 | 1.86 | 6.00 | 11.00 | 0.00 |
| {7899173/DHDDS=1,8127854/ME1=1,8016832/MMD=1,7948344/GLYAT=1}           | {7948344/GLYAT=2}   | 1.86 | 1.86 | 1.00 | 1.00 | Inf  | 2.00 | 1.86 | 6.00 | 11.00 | 0.00 |
| {7899173/DHDDS=1,8023995/FSTL3=1,8127854/ME1=1,7948344/GLYAT=1}         | {7948344/GLYAT=2}   | 1.87 | 1.87 | 1.00 | 1.00 | Inf  | 2.00 | 1.87 | 6.00 | 11.00 | 0.00 |
| {7899173/DHDDS=1,8023995/FSTL3=1,8127854/ME1=1,8016832/MMD=1}           | {7948344/GLYAT=2}   | 1.88 | 1.88 | 1.00 | 1.00 | Inf  | 2.00 | 1.88 | 6.00 | 11.00 | 0.00 |
| {7912692/HSPB7=1,8153684/DGAT1=1,8115327/SPARC=1,8153939/DGAT1=1}       | {8141094/PDK4=1}    | 1.88 | 1.88 | 1.00 | 1.00 | Inf  | 1.71 | 1.88 | 6.00 | 11.00 | 0.00 |
| {8023995/FSTL3=1,8127854/ME1=1,8016832/MMD=1,7948344/GLYAT=1}           | {7948344/GLYAT=2}   | 1.88 | 1.88 | 1.00 | 1.00 | Inf  | 2.00 | 1.88 | 6.00 | 11.00 | 0.00 |
| {8023995/FSTL3=1,7959298/TMEM120B=1,8131326/SLC29A4=1,8053406/RETSAT=1} | {8146000/ADAM9=1}   | 1.97 | 1.97 | 1.00 | 1.00 | Inf  | 1.71 | 1.97 | 6.00 | 11.00 | 0.00 |
| {7959298/TMEM120B=1,8153684/DGAT1=1,8153939/DGAT1=1,8074388/SLC25A1=1}  | {8146000/ADAM9=1}   | 1.93 | 1.93 | 1.00 | 1.00 | Inf  | 1.71 | 1.93 | 6.00 | 11.00 | 0.00 |
| {8024323/REEP6=1,8153684/DGAT1=1,8034544/PRDX2=1,8074388/SLC25A1=1}     | {8101992/SLC39A8=1} | 1.96 | 1.96 | 0.78 | 0.92 | 4.50 | 1.47 | 1.96 | 6.00 | 11.00 | 0.00 |
| {8024323/REEP6=1,8034544/PRDX2=1,8153939/DGAT1=1,8074388/SLC25A1=1}     | {8101992/SLC39A8=1} | 1.96 | 1.96 | 0.78 | 0.92 | 4.50 | 1.47 | 1.96 | 6.00 | 11.00 | 0.00 |
| {8024323/REEP6=1,8153684/DGAT1=1,8034544/PRDX2=1,8153939/DGAT1=1}       | {8101992/SLC39A8=1} | 1.95 | 1.95 | 0.59 | 0.85 | 2.44 | 1.35 | 1.95 | 6.00 | 11.00 | 0.00 |
| {8024323/REEP6=1,8153684/DGAT1=1,8153939/DGAT1=1,8074388/SLC25A1=1}     | {8101992/SLC39A8=1} | 1.91 | 1.91 | 0.59 | 0.85 | 2.44 | 1.35 | 1.91 | 6.00 | 11.00 | 0.00 |
| {8024323/REEP6=1,8153684/DGAT1=1,8153939/DGAT1=1,8180257/CEP170=2}      | {8141094/PDK4=1}    | 6.00 | 1.90 | 0.63 | 0.85 | 2.71 | 1.45 | 1.90 | 6.00 | 11.00 | 0.00 |

|                                                                                       |                                    |      |      |      |      |      |      |      |      |       |      |
|---------------------------------------------------------------------------------------|------------------------------------|------|------|------|------|------|------|------|------|-------|------|
| {8153684/DGAT1=1,8034544/PRDX2=1,8153939/DGAT1=1,8074388/SLC25A1=1}                   | {8101992/SLC39A8=1}                | 1.95 | 1.95 | 0.59 | 0.85 | 2.44 | 1.35 | 1.95 | 6.00 | 11.00 | 0.00 |
| {7897068/SKI=1,8023995/FSTL3=1,7959298/TMEM120B=1,8131326/SLC29A4=1,8053406/RETSAT=1} | {8146000/ADAM9=1}                  | 1.97 | 1.97 | 1.00 | 1.00 | Inf  | 1.71 | 1.97 | 6.00 | 11.00 | 1.00 |
| {7897068/SKI=1,7959298/TMEM120B=1,8153684/DGAT1=1,8153939/DGAT1=1,8074388/SLC25A1=1}  | {8146000/ADAM9=1}                  | 1.95 | 1.95 | 1.00 | 1.00 | Inf  | 1.71 | 1.95 | 6.00 | 11.00 | 1.00 |
| {7899173/DHDDS=1,8023995/FSTL3=1,8127854/ME1=1,8016832/MMD=1,7948344/GLYAT=1}         | {7948344/GLYAT=2}                  | 1.88 | 1.88 | 1.00 | 1.00 | Inf  | 2.00 | 1.88 | 6.00 | 11.00 | 0.00 |
| {8024323/REEP6=1,8153684/DGAT1=1,8034544/PRDX2=1,8153939/DGAT1=1,8074388/SLC25A1=1}   | {8101992/SLC39A8=1}                | 1.96 | 1.96 | 0.78 | 0.92 | 4.50 | 1.47 | 1.96 | 6.00 | 11.00 | 0.00 |
| {7897068/SKI=1}                                                                       | {7981142/CLMN=2,8146000/ADAM9=1}   | 1.88 | 1.88 | 0.69 | 0.85 | 3.25 | 1.69 | 1.88 | 1.20 | 11.00 | 1.00 |
| {8042942/HK2=1}                                                                       | {7907160/ATP1B1=1,8146000/ADAM9=1} | 1.74 | 1.74 | 0.60 | 0.79 | 2.53 | 1.71 | 1.74 | 6.00 | 11.00 | 0.00 |
| {7912692/HSPB7=1}                                                                     | {7981142/CLMN=2,8146000/ADAM9=1}   | 1.94 | 1.94 | 0.69 | 0.85 | 3.25 | 1.69 | 1.94 | 1.20 | 11.00 | 0.00 |
| {7959298/TMEM120B=1}                                                                  | {7981142/CLMN=2,8146000/ADAM9=1}   | 1.89 | 1.89 | 0.69 | 0.85 | 3.25 | 1.69 | 1.89 | 1.20 | 11.00 | 0.00 |
| {8067233/PMEPA1=1}                                                                    | {7981142/CLMN=2,8146000/ADAM9=1}   | 1.89 | 1.89 | 0.69 | 0.85 | 3.25 | 1.69 | 1.89 | 1.20 | 11.00 | 0.00 |
| {8180257/CEP170=2}                                                                    | {8141094/PDK4=1,8094679/KLB=2}     | 6.00 | 1.96 | 0.60 | 0.79 | 2.53 | 1.71 | 1.96 | 1.20 | 11.00 | 0.00 |
| {8053484/ST3GAL5=2}                                                                   | {7981142/CLMN=2,8146000/ADAM9=1}   | 1.94 | 1.94 | 0.57 | 0.79 | 2.33 | 1.57 | 1.94 | 6.00 | 11.00 | 0.00 |
| {7897068/SKI=1,7912692/HSPB7=1}                                                       | {7981142/CLMN=2,8146000/ADAM9=1}   | 1.94 | 1.94 | 0.83 | 0.92 | 6.00 | 1.83 | 1.94 | 1.20 | 11.00 | 1.00 |
| {7897068/SKI=1,7959298/TMEM120B=1}                                                    | {7981142/CLMN=2,8146000/ADAM9=1}   | 1.92 | 1.92 | 0.83 | 0.92 | 6.00 | 1.83 | 1.92 | 1.20 | 11.00 | 1.00 |

|                                                                     |                                      |      |      |      |      |      |      |      |      |       |      |
|---------------------------------------------------------------------|--------------------------------------|------|------|------|------|------|------|------|------|-------|------|
| {7897068/SKI=1,8067233/PMEPA1=1}                                    | {7981142/CLMN=2,8146000<br>/ADAM9=1} | 1.92 | 1.92 | 0.83 | 0.92 | 6.00 | 1.83 | 1.92 | 1.20 | 11.00 | 1.00 |
| {7959298/TMEM120B=1,7912692/HSPB7=1}                                | {7981142/CLMN=2,8146000<br>/ADAM9=1} | 1.96 | 1.96 | 1.00 | 1.00 | Inf  | 2.00 | 1.96 | 1.20 | 11.00 | 0.00 |
| {7912692/HSPB7=1,8067233/PMEPA1=1}                                  | {7981142/CLMN=2,8146000<br>/ADAM9=1} | 1.94 | 1.94 | 0.83 | 0.92 | 6.00 | 1.83 | 1.94 | 1.20 | 11.00 | 0.00 |
| {7959298/TMEM120B=1,8067233/PMEPA1=1}                               | {7981142/CLMN=2,8146000<br>/ADAM9=1} | 1.91 | 1.91 | 0.83 | 0.92 | 6.00 | 1.83 | 1.91 | 1.20 | 11.00 | 0.00 |
| {7897068/SKI=1,7959298/TMEM120B=1,7912692/HSPB7=1}                  | {7981142/CLMN=2,8146000<br>/ADAM9=1} | 1.96 | 1.96 | 1.00 | 1.00 | Inf  | 2.00 | 1.96 | 1.20 | 11.00 | 1.00 |
| {7897068/SKI=1,7912692/HSPB7=1,8067233/PMEPA1=1}                    | {7981142/CLMN=2,8146000<br>/ADAM9=1} | 1.94 | 1.94 | 0.83 | 0.92 | 6.00 | 1.83 | 1.94 | 1.20 | 11.00 | 1.00 |
| {7897068/SKI=1,7959298/TMEM120B=1,8067233/PMEPA1=1}                 | {7981142/CLMN=2,8146000<br>/ADAM9=1} | 1.94 | 1.94 | 1.00 | 1.00 | Inf  | 2.00 | 1.94 | 1.20 | 11.00 | 1.00 |
| {7959298/TMEM120B=1,7912692/HSPB7=1,8067233/PMEPA1=1}               | {7981142/CLMN=2,8146000<br>/ADAM9=1} | 1.96 | 1.96 | 1.00 | 1.00 | Inf  | 2.00 | 1.96 | 1.20 | 11.00 | 0.00 |
| {7897068/SKI=1,7959298/TMEM120B=1,7912692/HSPB7=1,8067233/PMEPA1=1} | {7981142/CLMN=2,8146000<br>/ADAM9=1} | 1.96 | 1.96 | 1.00 | 1.00 | Inf  | 2.00 | 1.96 | 1.20 | 11.00 | 1.00 |
