# Supplementary material for: eXplainable Artificial Intelligence (XAI) for the identification of biologically relevant gene expression patterns in longitudinal human studies, insights from obesity research
Source: PubMed Central journal article supplement (PMC7176286; doi:10.1371/journal.pcbi.1007792), 2020-04-10
Supplement: pcbi.1007792.s012.pdf [file pcbi.1007792.s012.pdf]

**Supplementary table 3.** The complete set of sequential rules that contain at least one of the identified key LHS and RHS loci (from the validation populations).

| LHS                  | RHS                      | BP   | CC   | CF   | CONF | CONV | LIFT | MF   | SP   | SUP   | TF   | Dataset       |
|----------------------|--------------------------|------|------|------|------|------|------|------|------|-------|------|---------------|
| {7980970/ITPK1=1}    | {7927285/FAM35DP RHEB=1} | 1.70 | 1.70 | 0.23 | 0.65 | 1.30 | 1.19 | 1.70 | 6.00 | 11.00 | 0.00 | GSE77962_VLCD |
| {7928872/SNCG=1}     | {8101992/SLC39A8=1}      | 1.90 | 1.90 | 0.47 | 0.80 | 1.88 | 1.28 | 1.90 | 1.20 | 12.00 | 0.00 | GSE77962_VLCD |
| {7928872/SNCG=1}     | {8146000/ADAM9=1}        | 1.71 | 1.71 | 0.36 | 0.73 | 1.56 | 1.26 | 1.71 | 1.20 | 11.00 | 0.00 | GSE77962_VLCD |
| {7959298/TMEM120B=1} | {8146000/ADAM9=1}        | 1.88 | 1.88 | 0.82 | 0.92 | 5.42 | 1.58 | 1.88 | 1.20 | 12.00 | 0.00 | GSE77962_VLCD |
| {7959298/TMEM120B=1} | {8160297/PLIN2=1}        | 1.92 | 1.92 | 0.69 | 0.85 | 3.25 | 1.69 | 6.00 | 1.20 | 11.00 | 0.00 | GSE77962_VLCD |
| {7959298/TMEM120B=1} | {7981142/CLMN=2}         | 1.88 | 1.88 | 0.63 | 0.85 | 2.71 | 1.45 | 1.88 | 1.20 | 11.00 | 0.00 | GSE77962_VLCD |
| {7980970/ITPK1=1}    | {8101992/SLC39A8=1}      | 1.92 | 1.92 | 0.22 | 0.71 | 1.28 | 1.13 | 1.92 | 6.00 | 12.00 | 0.00 | GSE77962_VLCD |
| {7980970/ITPK1=1}    | {8141094/PDK4=1}         | 1.69 | 1.69 | 0.15 | 0.65 | 1.18 | 1.11 | 1.69 | 6.00 | 11.00 | 0.00 | GSE77962_VLCD |
| {7980970/ITPK1=1}    | {7935776/=2}             | 6.00 | 6.00 | 0.29 | 0.65 | 1.42 | 1.29 | 6.00 | 6.00 | 11.00 | 0.00 | GSE77962_VLCD |
| {7980970/ITPK1=1}    | {8094679/KLB=2}          | 1.80 | 1.80 | 0.23 | 0.65 | 1.30 | 1.19 | 1.80 | 6.00 | 11.00 | 0.00 | GSE77962_VLCD |
| {7980970/ITPK1=1}    | {8171172/MXRA5=2}        | 1.98 | 1.98 | 0.15 | 0.65 | 1.18 | 1.11 | 1.98 | 6.00 | 11.00 | 0.00 | GSE77962_VLCD |
| {7999591/ABCC6=1}    | {7981142/CLMN=2}         | 1.91 | 1.91 | 0.25 | 0.69 | 1.33 | 1.18 | 1.91 | 1.20 | 11.00 | 0.00 | GSE77962_VLCD |
| {8034940/NOTCH3=1}   | {7981142/CLMN=2}         | 1.79 | 1.79 | 0.63 | 0.85 | 2.71 | 1.45 | 1.79 | 6.00 | 11.00 | 1.00 | GSE77962_VLCD |
| {8074388/SLC25A1=1}  | {8101992/SLC39A8=1}      | 1.84 | 1.84 | 0.43 | 0.79 | 1.75 | 1.26 | 1.84 | 1.20 | 11.00 | 0.00 | GSE77962_VLCD |
| {8074388/SLC25A1=1}  | {8146000/ADAM9=1}        | 1.83 | 1.83 | 0.49 | 0.79 | 1.94 | 1.35 | 1.83 | 1.20 | 11.00 | 0.00 | GSE77962_VLCD |
| {8131326/SLC29A4=1}  | {8101992/SLC39A8=1}      | 1.88 | 1.88 | 0.43 | 0.79 | 1.75 | 1.26 | 1.88 | 1.20 | 11.00 | 0.00 | GSE77962_VLCD |
| {7995574/HNRNPA1=2}  | {8101992/SLC39A8=1}      | 1.90 | 1.87 | 0.59 | 0.85 | 2.44 | 1.35 | 1.90 | 1.20 | 11.00 | 0.00 | GSE77962_VLCD |
| {8022814/HNRNPA1=2}  | {8101992/SLC39A8=1}      | 1.90 | 1.87 | 0.59 | 0.85 | 2.44 | 1.35 | 1.90 | 1.20 | 11.00 | 0.00 | GSE77962_VLCD |
| {8034313/HNRNPA1=2}  | {8101992/SLC39A8=1}      | 1.90 | 1.87 | 0.59 | 0.85 | 2.44 | 1.35 | 1.90 | 1.20 | 11.00 | 0.00 | GSE77962_VLCD |
| {8038942/ZNF432=2}   | {8101992/SLC39A8=1}      | 1.94 | 1.94 | 0.78 | 0.92 | 4.50 | 1.47 | 1.94 | 1.20 | 11.00 | 0.00 | GSE77962_VLCD |
| {8051622/SRSF7=2}    | {8101992/SLC39A8=1}      | 1.92 | 1.92 | 0.29 | 0.73 | 1.41 | 1.17 | 1.92 | 6.00 | 11.00 | 0.00 | GSE77962_VLCD |
| {8131326/SLC29A4=1}  | {8146000/ADAM9=1}        | 1.89 | 1.89 | 0.49 | 0.79 | 1.94 | 1.35 | 1.89 | 1.20 | 11.00 | 0.00 | GSE77962_VLCD |
| {8140468/GSAP=2}     | {7976795/MEG3=2}         | 6.00 | 6.00 | 0.49 | 0.79 | 1.94 | 1.35 | 6.00 | 1.20 | 11.00 | 0.00 | GSE77962_VLCD |
| {8140468/GSAP=2}     | {8171172/MXRA5=2}        | 1.97 | 1.97 | 0.49 | 0.79 | 1.94 | 1.35 | 1.97 | 1.20 | 11.00 | 0.00 | GSE77962_VLCD |
| {7928872/SNCG=1}     | {7932227/NMT2=1}         | 1.78 | 1.78 | 0.39 | 0.75 | 1.64 | 1.27 | 1.78 | 1.20 | 9.00  | 0.00 | GSE77962_LCD  |
| {7928872/SNCG=1}     | {8166079/EGFL6=1}        | 1.87 | 1.87 | 0.27 | 0.83 | 1.36 | 1.08 | 1.87 | 1.20 | 10.00 | 0.00 | GSE77962_LCD  |

|                         |                            |      |      |      |      |      |      |      |      |       |      |                        |
|-------------------------|----------------------------|------|------|------|------|------|------|------|------|-------|------|------------------------|
| {7928872/SNCG=1}        | {7928872/SNCG=2}           | 1.00 | 1.00 | 0.67 | 0.83 | 3.00 | 1.67 | 1.00 | 1.20 | 10.00 | 0.00 | GSE77962_LCD           |
| {8034940/NOTCH3=1}      | {7932227/NMT2=1}           | 1.59 | 1.59 | 0.13 | 0.64 | 1.15 | 1.09 | 1.59 | 6.00 | 9.00  | 1.00 | GSE77962_LCD           |
| {8061227/SLC24A3=1}     | {7932227/NMT2=1}           | 1.87 | 1.87 | 0.13 | 0.64 | 1.15 | 1.09 | 1.87 | 1.20 | 9.00  | 0.00 | GSE77962_LCD           |
| {8061227/SLC24A3=1}     | {7945232/ADAMTS15=1}       | 1.92 | 1.92 | 0.29 | 0.64 | 1.40 | 1.29 | 1.92 | 1.20 | 9.00  | 0.00 | GSE77962_LCD           |
| {8172043/SRPX=2}        | {7945232/ADAMTS15=1}       | 1.94 | 1.94 | 0.50 | 0.75 | 2.00 | 1.50 | 6.00 | 1.20 | 9.00  | 0.00 | GSE77962_LCD           |
| {7980970/ITPK1=1}       | {8032829/PLIN4=2}          | 6.00 | 1.90 | 0.50 | 0.75 | 2.00 | 1.50 | 6.00 | 6.00 | 9.00  | 0.00 | GSE77962_LCD           |
| {8061227/SLC24A3=1}     | {8005475/TRIM16 TRIM16L=1} | 1.84 | 1.84 | 0.37 | 0.86 | 1.59 | 1.11 | 1.84 | 1.20 | 12.00 | 0.00 | GSE77962_LCD           |
| {8032829/PLIN4=1}       | {8111864/C6=1}             | 6.00 | 1.92 | 0.48 | 0.69 | 1.92 | 1.69 | 6.00 | 6.00 | 9.00  | 0.00 | GSE77962_LCD           |
| {8032829/PLIN4=1}       | {7928872/SNCG=2}           | 6.00 | 1.89 | 0.38 | 0.69 | 1.63 | 1.38 | 6.00 | 1.20 | 9.00  | 0.00 | GSE77962_LCD           |
| {8032829/PLIN4=1}       | {8001457/CES1=2}           | 6.00 | 1.89 | 0.44 | 0.69 | 1.77 | 1.52 | 6.00 | 6.00 | 9.00  | 0.00 | GSE77962_LCD           |
| {8032829/PLIN4=1}       | {8032829/PLIN4=2}          | 6.00 | 1.83 | 0.54 | 0.77 | 2.17 | 1.54 | 6.00 | 1.20 | 10.00 | 0.00 | GSE77962_LCD           |
| {8034940/NOTCH3=1}      | {8166079/EGFL6=1}          | 1.79 | 1.79 | 0.37 | 0.86 | 1.59 | 1.11 | 1.79 | 6.00 | 12.00 | 1.00 | GSE77962_LCD           |
| {8034940/NOTCH3=1}      | {8004057/KIF1C=2}          | 1.76 | 1.76 | 0.35 | 0.64 | 1.53 | 1.41 | 1.76 | 6.00 | 9.00  | 1.00 | GSE77962_LCD           |
| {8034940/NOTCH3=1}      | {8032829/PLIN4=2}          | 6.00 | 1.84 | 0.29 | 0.64 | 1.40 | 1.29 | 6.00 | 6.00 | 9.00  | 1.00 | GSE77962_LCD           |
| {8061227/SLC24A3=1}     | {8137526/INSIG1=1}         | 1.86 | 1.86 | 0.43 | 0.71 | 1.75 | 1.43 | 1.86 | 1.20 | 10.00 | 0.00 | GSE77962_LCD           |
| {8061227/SLC24A3=1}     | {7988283/EIF3J-AS1=2}      | 6.00 | 6.00 | 0.21 | 0.64 | 1.27 | 1.18 | 6.00 | 1.20 | 9.00  | 0.00 | GSE77962_LCD           |
| {8061227/SLC24A3=1}     | {8032829/PLIN4=2}          | 6.00 | 1.94 | 0.29 | 0.64 | 1.40 | 1.29 | 6.00 | 1.20 | 9.00  | 0.00 | GSE77962_LCD           |
| {8087224/SLC25A20=1}    | {8166079/EGFL6=1}          | 1.96 | 1.96 | 0.27 | 0.83 | 1.36 | 1.08 | 1.96 | 1.20 | 10.00 | 0.00 | GSE77962_LCD           |
| {239043_at/ZNF404=1}    | {213107_at/TNIK=2}         | 1.42 | 1.42 | 1.00 | 1.00 | Inf  | 1.44 | 1.42 | 1.20 | 8.00  | 0.00 | GSE103766_WEIGHTREGAIN |
| {218345_at/TMEM176A=2}  | {220459_at/MCM3AP-AS1=2}   | 6.00 | 6.00 | 1.00 | 1.00 | Inf  | 1.44 | 6.00 | 1.20 | 9.00  | 0.00 | GSE103766_WEIGHTREGAIN |
| {221919_at/HNRNPA1=2}   | {1559261_a_at/PKD1L2=1}    | 1.92 | 1.92 | 1.00 | 1.00 | Inf  | 1.50 | 1.92 | 6.00 | 4.00  | 0.00 | GSE103766_WEIGHTLOSS   |
| {221919_at/HNRNPA1=2}   | {208229_at/FGFR2=1}        | 1.00 | 1.00 | 1.00 | 1.00 | Inf  | 1.50 | 1.00 | 6.00 | 4.00  | 0.00 | GSE103766_WEIGHTLOSS   |
| {1558755_x_at/ZNF763=2} | {211623_s_at/FBL=2}        | 1.73 | 1.73 | 1.00 | 1.00 | Inf  | 1.20 | 1.73 | 6.00 | 4.00  | 0.00 | GSE103766_WEIGHTLOSS   |
| {210168_at/C6=2}        | {1566780_at/=2}            | 6.00 | 6.00 | 1.00 | 1.00 | Inf  | 1.50 | 6.00 | 6.00 | 4.00  | 0.00 | GSE103766_WEIGHTLOSS   |
| {210168_at/C6=2}        | {221950_at/EMX2=2}         | 1.72 | 1.72 | 1.00 | 1.00 | Inf  | 1.50 | 1.72 | 6.00 | 4.00  | 0.00 | GSE103766_WEIGHTLOSS   |
| {210168_at/C6=2}        | {227410_at/FAM43A=2}       | 6.00 | 6.00 | 1.00 | 1.00 | Inf  | 1.50 | 6.00 | 6.00 | 4.00  | 0.00 | GSE103766_WEIGHTLOSS   |
| {210168_at/C6=2}        | {243244_at/CACNB4=2}       | 1.83 | 1.83 | 1.00 | 1.00 | Inf  | 1.20 | 1.83 | 6.00 | 4.00  | 0.00 | GSE103766_WEIGHTLOSS   |
| {229634_at/TMEM139=1}   | {201129_at/SRSF7=1}        | 6.00 | 1.97 | 1.00 | 1.00 | Inf  | 1.60 | 1.97 | 6.00 | 5.00  | 0.00 | GSE35411               |
| {201129_at/SRSF7=2}     | {201129_at/SRSF7=1}        | 1.05 | 1.05 | 1.00 | 1.00 | Inf  | 1.60 | 1.05 | 6.00 | 5.00  | 0.00 | GSE35411               |

|                        |                             |      |      |      |      |      |      |      |      |      |      |          |
|------------------------|-----------------------------|------|------|------|------|------|------|------|------|------|------|----------|
| {210168_at/C6=2}       | {201129_at/SRSF7=1}         | 1.77 | 1.77 | 1.00 | 1.00 | Inf  | 1.60 | 1.77 | 6.00 | 5.00 | 0.00 | GSE35411 |
| {229634_at/TMEM139=1}  | {210168_at/C6=1}            | 6.00 | 1.94 | 1.00 | 1.00 | Inf  | 1.60 | 1.94 | 6.00 | 5.00 | 0.00 | GSE35411 |
| {201129_at/SRSF7=2}    | {210168_at/C6=1}            | 1.77 | 1.77 | 1.00 | 1.00 | Inf  | 1.60 | 1.77 | 6.00 | 5.00 | 0.00 | GSE35411 |
| {210168_at/C6=2}       | {210168_at/C6=1}            | 1.00 | 1.00 | 1.00 | 1.00 | Inf  | 1.60 | 1.00 | 6.00 | 5.00 | 0.00 | GSE35411 |
| {229634_at/TMEM139=1}  | {211673_s_at/MOCS1=1}       | 6.00 | 1.98 | 1.00 | 1.00 | Inf  | 1.60 | 1.98 | 6.00 | 5.00 | 0.00 | GSE35411 |
| {201129_at/SRSF7=2}    | {211673_s_at/MOCS1=1}       | 1.79 | 1.79 | 1.00 | 1.00 | Inf  | 1.60 | 1.79 | 6.00 | 5.00 | 0.00 | GSE35411 |
| {210168_at/C6=2}       | {211673_s_at/MOCS1=1}       | 1.86 | 1.86 | 1.00 | 1.00 | Inf  | 1.60 | 1.86 | 6.00 | 5.00 | 0.00 | GSE35411 |
| {229634_at/TMEM139=1}  | {214455_at/HIST1H2BC=2}     | 6.00 | 1.97 | 1.00 | 1.00 | Inf  | 1.60 | 1.97 | 6.00 | 5.00 | 0.00 | GSE35411 |
| {229634_at/TMEM139=1}  | {215071_s_at/HIST1H2AC=2}   | 6.00 | 1.97 | 1.00 | 1.00 | Inf  | 1.60 | 1.97 | 6.00 | 5.00 | 0.00 | GSE35411 |
| {229634_at/TMEM139=1}  | {230246_at/PLAC9=2}         | 6.00 | 1.97 | 1.00 | 1.00 | Inf  | 1.33 | 1.97 | 1.20 | 5.00 | 0.00 | GSE35411 |
| {229634_at/TMEM139=1}  | {232035_at/HIST1H4H=2}      | 6.00 | 1.97 | 1.00 | 1.00 | Inf  | 1.60 | 1.97 | 1.20 | 5.00 | 0.00 | GSE35411 |
| {201129_at/SRSF7=2}    | {214455_at/HIST1H2BC=2}     | 1.72 | 1.72 | 1.00 | 1.00 | Inf  | 1.60 | 1.72 | 6.00 | 5.00 | 0.00 | GSE35411 |
| {201129_at/SRSF7=2}    | {215071_s_at/HIST1H2AC=2}   | 1.74 | 1.74 | 1.00 | 1.00 | Inf  | 1.60 | 1.74 | 6.00 | 5.00 | 0.00 | GSE35411 |
| {201129_at/SRSF7=2}    | {230246_at/PLAC9=2}         | 6.00 | 1.97 | 1.00 | 1.00 | Inf  | 1.33 | 1.97 | 6.00 | 5.00 | 0.00 | GSE35411 |
| {201129_at/SRSF7=2}    | {232035_at/HIST1H4H=2}      | 1.51 | 1.51 | 1.00 | 1.00 | Inf  | 1.60 | 1.51 | 6.00 | 5.00 | 0.00 | GSE35411 |
| {204955_at/SRPX=2}     | {224735_at/CYB561A3=2}      | 1.87 | 1.87 | 1.00 | 1.00 | Inf  | 1.60 | 1.87 | 1.20 | 5.00 | 0.00 | GSE35411 |
| {210168_at/C6=2}       | {214455_at/HIST1H2BC=2}     | 1.75 | 1.75 | 1.00 | 1.00 | Inf  | 1.60 | 1.75 | 6.00 | 5.00 | 0.00 | GSE35411 |
| {210168_at/C6=2}       | {215071_s_at/HIST1H2AC=2}   | 1.86 | 1.86 | 1.00 | 1.00 | Inf  | 1.60 | 1.86 | 6.00 | 5.00 | 0.00 | GSE35411 |
| {210168_at/C6=2}       | {230246_at/PLAC9=2}         | 6.00 | 1.97 | 1.00 | 1.00 | Inf  | 1.33 | 1.97 | 6.00 | 5.00 | 0.00 | GSE35411 |
| {210168_at/C6=2}       | {232035_at/HIST1H4H=2}      | 1.65 | 1.65 | 1.00 | 1.00 | Inf  | 1.60 | 1.65 | 6.00 | 5.00 | 0.00 | GSE35411 |
| {7945774/SLC22A18AS=1} | {7900699/CDC20=1}           | 1.97 | 1.97 | 1.00 | 1.00 | Inf  | 1.13 | 1.97 | 6.00 | 6.00 | 0.00 | GSE70529 |
| {8140478/GSAP=2}       | {7900699/CDC20=1}           | 1.56 | 1.56 | 1.00 | 1.00 | Inf  | 1.13 | 1.56 | 6.00 | 6.00 | 0.00 | GSE70529 |
| {8140478/GSAP=2}       | {7935572/MIR1287 PYROXD2=1} | 1.87 | 1.90 | 1.00 | 1.00 | Inf  | 1.29 | 1.95 | 1.20 | 6.00 | 0.00 | GSE70529 |
| {7945774/SLC22A18AS=1} | {7966150/SSH1=1}            | 1.97 | 1.97 | 1.00 | 1.00 | Inf  | 1.13 | 1.97 | 6.00 | 6.00 | 0.00 | GSE70529 |
| {7945774/SLC22A18AS=1} | {7966829/WSB2=1}            | 1.98 | 1.98 | 0.00 | 1.00 | 1.00 | 1.00 | 6.00 | 1.20 | 6.00 | 0.00 | GSE70529 |
| {7945774/SLC22A18AS=1} | {8107321/EPB41L4A-AS1=2}    | 6.00 | 6.00 | 0.00 | 1.00 | 1.00 | 1.00 | 6.00 | 1.20 | 6.00 | 0.00 | GSE70529 |
| {7945774/SLC22A18AS=1} | {8140356/HIP1=2}            | 1.97 | 1.97 | 1.00 | 1.00 | Inf  | 1.13 | 1.97 | 1.20 | 6.00 | 0.00 | GSE70529 |
| {8140478/GSAP=2}       | {7966150/SSH1=1}            | 1.66 | 1.66 | 1.00 | 1.00 | Inf  | 1.13 | 1.66 | 6.00 | 6.00 | 0.00 | GSE70529 |
| {8140478/GSAP=2}       | {7966829/WSB2=1}            | 1.80 | 1.80 | 0.00 | 1.00 | 1.00 | 1.00 | 6.00 | 1.20 | 6.00 | 0.00 | GSE70529 |

|                        |                          |      |      |      |      |      |      |      |      |      |      |                        |
|------------------------|--------------------------|------|------|------|------|------|------|------|------|------|------|------------------------|
| {8140478/GSAP=2}       | {8114455/HSPA9=1}        | 1.77 | 1.77 | 1.00 | 1.00 | Inf  | 1.29 | 1.77 | 1.20 | 6.00 | 0.00 | GSE70529               |
| {8140478/GSAP=2}       | {8114805/FGF1=1}         | 1.56 | 1.56 | 1.00 | 1.00 | Inf  | 1.13 | 1.56 | 1.20 | 6.00 | 0.00 | GSE70529               |
| {8140478/GSAP=2}       | {8135909/LEP=1}          | 1.66 | 1.66 | 1.00 | 1.00 | Inf  | 1.29 | 6.00 | 1.20 | 6.00 | 0.00 | GSE70529               |
| {8140478/GSAP=2}       | {7949857/NUDT8=2}        | 6.00 | 6.00 | 1.00 | 1.00 | Inf  | 1.50 | 1.98 | 1.20 | 6.00 | 0.00 | GSE70529               |
| {8140478/GSAP=2}       | {8107321/EPB41L4A-AS1=2} | 6.00 | 6.00 | 0.00 | 1.00 | 1.00 | 1.00 | 6.00 | 1.20 | 6.00 | 0.00 | GSE70529               |
| {218345_at/TMEM176A=2} | {212266_s_at/SRSF5=2}    | 6.00 | 1.98 | 1.00 | 1.00 | Inf  | 1.44 | 6.00 | 6.00 | 8.00 | 0.00 | GSE103766_WEIGHTREGAIN |
